1 **Enterohepatic Transcription Factor CREB3L3 Protects Atherosclerosis via SREBP**

2 **Competitive Inhibition**

3

4 <sup>1,2,3,4,#</sup>Yoshimi Nakagawa, <sup>1,#</sup>Yunong Wang, <sup>1,2,#</sup>Song-iee Han, <sup>1</sup>Kanako Okuda, <sup>1</sup>Asayo Oishi,

5 <sup>1</sup>Yuka Yagishita, <sup>1</sup>Kae Kumagai, <sup>1</sup>Hiroshi Ohno, <sup>1</sup>Yoshinori Osaki, <sup>1</sup>Yuhei Mizunoe, <sup>1</sup>Masaya

6 Araki, <sup>1</sup>Yuki Murayama, <sup>1</sup>Hitoshi Iwasaki, <sup>5</sup>Morichika Konishi, <sup>6</sup>Nobuyuki Itoh, <sup>1</sup>Takashi

7 Matsuzaka, <sup>7</sup>Hirohito Sone, <sup>1</sup>Nobuhiro Yamada, <sup>1,2,4,8</sup>Hitoshi Shimano

8

9 <sup>1</sup>Department of Internal Medicine (Endocrinology and Metabolism), Faculty of Medicine,

10 University of Tsukuba, 1-1-1 Tennodai, Tsukuba, Ibaraki 305-8575, Japan

11 <sup>2</sup>International Institute for Integrative Sleep Medicine (WPI-IIS), University of Tsukuba, 1-1-1

12 Tennodai, Tsukuba, Ibaraki 305-8575, Japan

13 <sup>3</sup>Division of Complex Bioscience Research, Department of Research and Development,

14 Institute of Natural Medicine, University of Toyama, 2630 Sugitani, Toyama, Toyama 930-

15 0194, Japan

16 <sup>4</sup>Japan Agency for Medical Research and Development–Core Research for Evolutional

17 Science and Technology (AMED-CREST), 1-7-1 Otemachi, Chiyoda-ku, Tokyo, Japan

18 <sup>5</sup>Department of Microbial Chemistry, Kobe Pharmaceutical University, 4-19-1,

19 Motoyamakitamachi, Higashinada-ku, Kobe, Hyogo, 658-8558, JAPAN

20 <sup>6</sup>Department of Genetic Biochemistry, Graduate School of Pharmaceutical Science, Kyoto

21 University, 46-29 Yoshida-Shimoadachi-Cho, Sakyo-ku, Kyoto, Kyoto 606-8501, JAPAN

22 <sup>7</sup>Department of Hematology, Endocrinology and Metabolism, Niigata University Faculty of

23 Medicine, 757 Asahimachi, Niigata, Niigata 951-8510, Japan

24 <sup>8</sup>Life Science Center for Survival Dynamics, Tsukuba Advanced Research Alliance (TARA),

25 University of Tsukuba, 1-1-1 Tennodai, Tsukuba, Ibaraki 305-8577, Japan

26

27 #These authors contributed equally to this work.

28

29 **Correspondence;**

30 [ynaka@inm.u-toyama.ac.jp](mailto:ynaka@inm.u-toyama.ac.jp)

31 and

32 [hshimano@md.tsukuba.ac.jp](mailto:hshimano@md.tsukuba.ac.jp)

33

34

35 **Summary**

36 CREB3L3 is a membrane-bound transcription factor to maintain lipid metabolism in the liver  
37 and small intestine. CREB3L3 ablation in *Ldlr<sup>-/-</sup>* mice exacerbated hyperlipidemia with  
38 remnant ApoB-containing lipoprotein accumulation, developing enhanced aortic atheroma  
39 formation, whose extent was additive between liver- and intestine-specific deletion.  
40 Conversely, hepatic nuclear CREB3L3 overexpression markedly suppressed atherosclerosis  
41 with amelioration of hyperlipidemia. CREB3L3 directly upregulates anti-atherogenic FGF21  
42 and ApoA4, whereas antagonizes hepatic SREBP-mediated lipogenic and cholesterologenic  
43 genes and regulates LXR-regulated genes involved in intestinal transport of cholesterol.  
44 CREB3L3 deficiency accumulates nuclear SREBP proteins. Because both transcriptional  
45 factors share the cleavage system for nuclear transactivation, full-length CREB3L3 and  
46 SREBPs on endoplasmic reticulum (ER) functionally inhibit each other. CREB3L3  
47 competitively antagonizes SREBPs for ER-Golgi transport, resulting in ER retention and  
48 proteolytic activation inhibition at Golgi, and vice versa. Collectively, due to this new  
49 mechanistic interaction between CREB3L3 and SREBPs under atherogenic conditions,  
50 CREB3L3 has multi-potent protective effects against atherosclerosis.

51

52 **Keywords:** CREB3L3, SREBP, Atherosclerosis, hyperlipidemia, Enterohepatic circulation

53

## 54 Introduction

55 cAMP responsive element-binding protein 3 like 3 (*Creb3l3*) is expressed only in  
56 liver and intestinal cells(Lee *et al.* , 2011), where the CREB3L3 protein localizes in the  
57 endoplasmic reticulum (ER) and is transported to the Golgi apparatus and nucleus (Lee *et*  
58 *al.* , 2011, Omori *et al.* , 2001, Zhang *et al.* , 2006). Nuclear expression of the active form of  
59 CREB3L3 in the nucleus is increased under fasting, consistent with the finding that *Creb3l3*  
60 mRNA expression is higher during fasting than refeeding (Danno *et al.* , 2010). CREB3L3  
61 reduces plasma triglyceride (TG) levels by increasing hepatic expression of apolipoprotein-  
62 encoding genes, such as apolipoprotein A4 (*Apoa4*), *Apoa5*, and *Apoc2* (Lee *et al.* , 2011);  
63 these activate blood lipoprotein lipase (LPL) activity. *Creb3l3*<sup>-/-</sup> mice exhibit massive hepatic  
64 lipid metabolite accumulation and significantly increased plasma TG levels, or nonalcoholic  
65 steatohepatitis when fed an atherogenic high-fat diet (Luebke-Wheeler *et al.* , 2008). *Apoa4*  
66 regulates HDL metabolism by activating lecithin-cholesterol acyltransferase, a key enzyme  
67 involved in cholesterol transfer to newly synthesized HDL particles (Chen and Albers, 1985,  
68 Steinmetz and Utermann, 1985), stimulating cholesterol efflux from macrophages (Fournier  
69 *et al.* , 2000) and activating receptor-mediated uptake of HDL by hepatocytes (Steinmetz *et*  
70 *al.* , 1990). *Apoa4*-overexpressed mice prevent atherosclerosis development (Cohen *et al.* ,  
71 1997, Duverger *et al.* , 1996, Ostos *et al.* , 2001).

72 CREB3L3 and peroxisome proliferator-activated receptor alpha (PPAR $\alpha$ )  
73 synergistically activate hepatic fibroblast growth factor 21 (FGF21) expression (Kim *et al.* ,  
74 2014, Nakagawa *et al.* , 2014). Synthesized FGF21 proteins are secreted into circulation and  
75 transported to peripheral tissues. This includes brain and skeletal muscle, as well as white  
76 adipose tissue and brown adipose tissue, in which FGF21 activates lipolysis and  
77 thermogenesis, respectively (Fisher *et al.* , 2012). These effects improve diabetes and  
78 hyperlipidemia by reducing plasma glucose, insulin, TG, and cholesterol. FGF21 suppresses

79 atherosclerotic development by reducing hypercholesterolemia, oxidative stress, and  
80 vascular smooth muscle cell proliferation via adiponectin-dependent and -independent  
81 mechanisms (Kokkinos *et al.* , 2017, Lin *et al.* , 2015). FGF21 regulates monocyte and  
82 macrophage recruitment, proliferation, and inflammatory functions in bloods and myocardial  
83 tissues, preventing macrophage accumulation, inflammation, and fibrosis (Lin *et al.* , 2015,  
84 Liu *et al.* , 2013, Pan *et al.* , 2018).

85 Recently, it has been shown that CREB3L3 plays a crucial role in lipoprotein  
86 metabolism and *Ldlr*<sup>-/-</sup>*Creb3l3*<sup>-/-</sup> mice develop significantly more atherosclerotic lesions in  
87 the aortas than *Ldlr*<sup>-/-</sup> mice (Park *et al.* , 2016). However, the contribution of hepatic and  
88 intestinal CREB3L3 to atherosclerosis still remains unclear. In this study, we revealed that  
89 *Ldlr*<sup>-/-</sup>*Creb3l3*<sup>-/-</sup> mice exhibited severe atherosclerosis by upregulating sterol regulatory  
90 element-binding protein (SREBP) activation. Liver and intestine-specific CREB3L3 knockout  
91 in *Ldlr*<sup>-/-</sup> mice (*Ldlr*<sup>-/-</sup> LKO and *Ldlr*<sup>-/-</sup> IKO) also showed accelerated atherosclerosis  
92 formation compared with *Ldlr*<sup>-/-</sup> mice. Conversely, hepatic CREB3L3 overexpression  
93 (TgCREB3L3) in *Ldlr*<sup>-/-</sup> (*Ldlr*<sup>-/-</sup>TgCREB3L3) mice suppressed atherosclerosis. Taken  
94 together, we propose that CREB3L3 in entero-hepatic circulation has a crucial role in  
95 atherosclerosis development and its mechanism is investigated.

96

## 97 **Results**

### 98 ***Creb3l3* deletion promotes atherosclerosis with severe hyperlipidemia at an early** 99 **stage of WD diet and irrespective of genders**

100 To evaluate early stage of atherosclerosis *Ldlr*<sup>-/-</sup>*Creb3l3*<sup>-/-</sup> mice, female and male  
101 *Ldlr*<sup>-/-</sup>*Creb3l3*<sup>-/-</sup> mice fed a WD for 5 weeks were evaluated. Both female and male  
102 *Ldlr*<sup>-/-</sup>*Creb3l3*<sup>-/-</sup> mice had a significant increase in atherosclerotic lesion formation in both  
103 the entire aorta and aortic root compared with control *Ldlr*<sup>-/-</sup> mice, which showed barely

104 detectable lesions at this stage (Figure 1A, 1B, Figure 1—figure supplement 1A, 1B). Plasma  
105 TG, total cholesterol (TC), and free fatty acids (FFA) levels were markedly higher in female  
106 and male *Ldlr*<sup>-/-</sup>*Creb3l3*<sup>-/-</sup> mice than in *Ldlr*<sup>-/-</sup> mice (Figure 1C, 1D, Figure 1—figure  
107 supplement 1C, 1D). High-performance liquid chromatography (HPLC) analysis revealed  
108 marked accumulation of TG and cholesterol, and significant enrichment of ApoB-containing  
109 lipoprotein fractions in female and male *Ldlr*<sup>-/-</sup>*Creb3l3*<sup>-/-</sup> mice (Figure 1C, Figure 1—figure  
110 supplement 1C). Significant increases in very low-density lipoproteins (VLDL)-ApoB proteins  
111 (ApoB100 and ApoB40) were observed in female and male *Ldlr*<sup>-/-</sup>*Creb3l3*<sup>-/-</sup> mice relative to  
112 *Ldlr*<sup>-/-</sup> control mice (Figure 1C, Figure 1—figure supplement 1C), indicating increased  
113 numbers of both hepatic and intestinal ApoB lipoprotein particles. ApoA4, a target for  
114 CREB3L3(Xu et al. , 2014), has been reported to be anti-atherogenic because its  
115 overexpression protects against atherosclerosis (Cohen et al. , 1997, Duverger et al. , 1996,  
116 Ostos et al. , 2001). Plasma ApoA4 levels of *Ldlr*<sup>-/-</sup>*Creb3l3*<sup>-/-</sup> mice were significantly lower  
117 than that of *Ldlr*<sup>-/-</sup> mice (Figure 1C, Figure 1—figure supplement 1C). Plasma levels of  
118 FGF21, anti-atherogenic hormone were significantly reduced in female and male  
119 *Ldlr*<sup>-/-</sup>*Creb3l3*<sup>-/-</sup> mice (Figure 1D, Figure 1—figure supplement 1D). Collectively, we  
120 speculated that the absence of *Creb3l3* induced severe combined hyperlipidemia with pro-  
121 atherogenic plasma lipoprotein and hormonal profiles. It is of a note that the atherosclerosis  
122 lesion was less but clearly visible in *Ldlr*<sup>-/-</sup>*Creb3l3*<sup>-/-</sup> mice even when they consumed a  
123 normal diet, which gave rise to almost negligible atheroma in *Ldlr*<sup>-/-</sup> mice (Figure 1—figure  
124 supplement 2).

125

126 **Deficiency of CREB3L3 dysregulates hepatic lipid metabolism and subsequently**  
127 **exacerbates steatohepatitis**

128 Plasma aspartate aminotransferase (AST) and alanine aminotransferase (ALT) levels

129 were also increased (Figure 1E), suggesting more severe liver injury in *Ldlr<sup>-/-</sup>Creb3l3<sup>-/-</sup>* mice  
130 vs. *Ldlr<sup>-/-</sup>* mice. Histological liver sections from female and male *Ldlr<sup>-/-</sup>Creb3l3<sup>-/-</sup>* mice  
131 exhibited severe lipid accumulation (Figure 1F, Figure 1—figure supplement 1E); liver TG  
132 and TC levels in female and male *Ldlr<sup>-/-</sup>Creb3l3<sup>-/-</sup>* mice were higher than those of *Ldlr<sup>-/-</sup>*  
133 mice (Figure 1F, Figure 1—figure supplement 1E), supporting that *Ldlr<sup>-/-</sup>Creb3l3<sup>-/-</sup>* mice  
134 increase *de novo* lipogenesis and hepatosteatosis. Taken together, we found that  
135 *Ldlr<sup>-/-</sup>Creb3l3<sup>-/-</sup>* mice develop both atherosclerosis and hepatosteatosis, association of  
136 which is a recent clinical topic, regardless of gender differences. Therefore, disruption of  
137 CREB3L3 is a very strong risk factor for the onset and progression of arteriosclerosis. After  
138 this, we mainly used female mice for studying KO mice.

139

#### 140 **Deletion of CREB3L3 in the small intestine promotes lipid absorption from diet, which** 141 **contributes to hyperlipidemia**

142 *Creb3l3* is also expressed in the intestines. Histological analysis with periodic acid-  
143 Schiff staining revealed no differences in the small intestinal mucin-producing goblet cells  
144 (Figure 1G). However, enhanced lipid accumulation in the villi of female *Ldlr<sup>-/-</sup>Creb3l3<sup>-/-</sup>*  
145 mice fed a WD for 5 weeks were detected and quantitatively confirmed (Figure 1G, H),  
146 suggesting that there is a dysregulation of lipid metabolism in the small intestines of  
147 *Ldlr<sup>-/-</sup>Creb3l3<sup>-/-</sup>* mice. Cholesterol absorption markers, such as campesterol and  $\beta$ -sitosterol  
148 levels (Matthan *et al.*, 2003), in the plasma of *Ldlr<sup>-/-</sup>Creb3l3<sup>-/-</sup>* mice, were significantly higher  
149 than those in *Ldlr<sup>-/-</sup>* mice (Figure 1I). Taken together, the *Creb3l3* deletion in the small  
150 intestine might cause an increase in intestinal cholesterol absorption, thus exacerbating  
151 hyperlipidemia. *Ldlr<sup>-/-</sup>Creb3l3<sup>-/-</sup>* mice showed an apparent increase of chylomicron  
152 production (Figure 1—figure supplement 3), supporting that deficiency of CREB3L3  
153 increases the activity of TG absorption in intestine and subsequent chylomicron-TG

154 production. Taken together, CREB3L3 deletion in the small intestine contributes to  
155 hyperlipidemia. Conversely, as we previously reported, intestinal CREB3L3-overexpressed  
156 mice exhibited the suppression of plasma TC levels when fed the same diet via the  
157 suppression of cholesterol absorption in the intestine (*Kikuchi et al. , 2016*). These findings  
158 indicate that hepatic CREB3L3 regulates TG metabolism, and that intestinal CREB3L3  
159 regulates cholesterol and TG absorption in the small intestine, further suggesting that  
160 CREB3L3 regulates systemic lipid metabolism in enterohepatic circulation.

161

162 ***Ldlr*<sup>-/-</sup>*Creb3l3*<sup>-/-</sup> mice exacerbate arteriosclerosis after a WD feeding for 3 months, a**  
163 **standard condition of the evaluation**

164 *Ldlr*<sup>-/-</sup>*Creb3l3*<sup>-/-</sup> mice exhibited early severe atherosclerosis and remained in these  
165 phenotypes even in a WD feeding for 3 months. Like when fed for 5 weeks, female  
166 *Ldlr*<sup>-/-</sup>*Creb3l3*<sup>-/-</sup> mice revealed a significant increase in atherosclerotic lesion formation  
167 (Figure 2A, B). Plasma lipid levels were markedly higher in *Ldlr*<sup>-/-</sup>*Creb3l3*<sup>-/-</sup> mice than in  
168 *Ldlr*<sup>-/-</sup> mice (Figure 2C, D), accompanied with a marked accumulation of both TG in  
169 chylomicron, VLDL, IDL, and LDL fractions, and the entire ApoB-containing lipoproteins of  
170 *Ldlr*<sup>-/-</sup>*Creb3l3*<sup>-/-</sup> mice (Figure 2C). Plasma FGF21 levels of *Ldlr*<sup>-/-</sup>*Creb3l3*<sup>-/-</sup> mice were  
171 significantly lower than those of *Ldlr*<sup>-/-</sup> mice (Figure 2D). These findings indicate that ~~even~~  
172 when feeding a WD for 3 months, deficiency of *Creb3l3* exhibits severe atherosclerosis  
173 development with severe combined hyperlipidemia.

174

175 **Liver and intestine CREB3L3 deficiency additively develops atherosclerosis**

176 To define the tissue-specific contribution of CREB3L3 to suppress atherosclerosis,  
177 liver- and intestine-specific CREB3L3 knockout (LKO and IKO) mice (*Nakagawa et al. ,*  
178 *2016a*) were crossed with *Ldlr*<sup>-/-</sup> mice, generating *Ldlr*<sup>-/-</sup>CREB3L3 LKO and *Ldlr*<sup>-/-</sup>CREB3L3



179 IKO mice, respectively. By further crossing these mice, CREB3L3 specifically deficient in  
180 both liver and intestine of *Ldlr*<sup>-/-</sup> (*Ldlr*<sup>-/-</sup>CREB3L3 DKO) mice were generated. The general  
181 plasma biochemical phenotypes of these mice on a normal diet were evaluated at 8 weeks;  
182 both *Ldlr*<sup>-/-</sup>CREB3L3 LKO and *Ldlr*<sup>-/-</sup>CREB3L3 IKO mice showed higher plasma TG levels  
183 than *Ldlr*<sup>-/-</sup>flox mice (Figure 3—figure supplement 1A). Plasma TC levels of *Ldlr*<sup>-/-</sup>CREB3L3  
184 LKO were significant higher, but those of *Ldlr*<sup>-/-</sup>CREB3L3 IKO were not changed compared  
185 with *Ldlr*<sup>-/-</sup>flox mice. *Ldlr*<sup>-/-</sup>CREB3L3 DKO mice additively increased both plasma TG and TC  
186 levels additively with liver and small intestine defects (Figure S4B). HPLC analysis exhibited  
187 higher plasma TG and cholesterol levels, which were distributed over ApoB-containing  
188 lipoproteins in the order of DKO, LKO, IKO, flox mice (Figure 3—figure supplement 1A, B).  
189 DKO particularly showed a peak in the chylomicron fraction and decrease in HDL  
190 cholesterol. The pattern of plasma FFA levels was similar with that of plasma TG levels  
191 (Figure 3—figure supplement 1C). Plasma FGF21 levels of *Ldlr*<sup>-/-</sup>CREB3L3 LKO and  
192 *Ldlr*<sup>-/-</sup>CREB3L3 DKO mice were significantly lower than those of *Ldlr*<sup>-/-</sup>flox mice (Figure 3—  
193 figure supplement 1C), indicating that plasma FGF21 levels were dependent on hepatic  
194 CREB3L3 in contrast to both organ CREB3L3 contribution to plasma lipids. Taken together,  
195 the data indicate that both liver- and intestine-CREB3L3 additively contribute to lipid  
196 metabolism.

197         After feeding the mice with WD for 3 months, atherosclerotic lesion areas in either  
198 group KO mice were greater than those in control flox mice with increases in the ascending  
199 order of IKO, LKO, and DKO mice in the estimations by both the entire area and cross  
200 section at sinus (Figure 3A, B). Due to both liver and intestine absence of CREB3L3,  
201 *Ldlr*<sup>-/-</sup>CREB3L3 DKO mice further exacerbated atherosclerosis development, presumably by  
202 absence of both collaboratively disturbing lipid metabolism and forming atherogenic risks  
203 (Figure 3A, B).

204

205 **Hepatic CREB3L3 activation suppresses formation of atherosclerotic lesions in *Ldlr*<sup>-/-</sup>**  
206 **mice that were fed a WD**

207 Mice with hepatic overexpression of active CREB3L3 (TgCREB3L3; Figure 4—  
208 figure supplement 1) (Nakagawa *et al.*, 2014) were crossed with *Ldlr*<sup>-/-</sup> mice. *Ldlr*<sup>-/-</sup> and  
209 *Ldlr*<sup>-/-</sup> TgCREB3L3 mice were fed a WD for 3 months and then were subjected to an  
210 atherosclerosis analysis. Lesions were markedly suppressed in both the entire aorta and  
211 aortic root of *Ldlr*<sup>-/-</sup> TgCREB3L3 mice (Figure 4A, B), indicating that hepatic CREB3L3  
212 overexpression attenuates WD-induced atherosclerosis development. Additionally, because  
213 FGF21, a main CREB3L3 target, has been reported to have a protective effect against  
214 atherosclerosis, the contribution of FGF21 in these phenotypes was estimated by crossing  
215 *Ldlr*<sup>-/-</sup> TgCREB3L3 mice with *Fgf21*<sup>-/-</sup> mice to generate *Ldlr*<sup>-/-</sup> TgCREB3L3 *Fgf21*<sup>-/-</sup> mice,  
216 followed by fed on a WD diet for 3 months. Deletion of FGF21 was confirmed by showing  
217 that plasma FGF21 levels were significantly increased in *Ldlr*<sup>-/-</sup> TgCREB3L3 mice and not  
218 detected in *Fgf21*<sup>-/-</sup> background mice (Figure 4C). Consistent with a previous report (Lin *et*  
219 *al.*, 2015), *Ldlr*<sup>-/-</sup> *Fgf21*<sup>-/-</sup> mice showed a trend of more severe atherosclerosis development.  
220 However, *Ldlr*<sup>-/-</sup> *Fgf21*<sup>-/-</sup> TgCREB3L3 mice still maintained significant suppression of  
221 atherosclerosis to similar extent in the presence of FGF21 as inhibition rates by CREB3L3  
222 overexpression was estimated to be about 50% in *Ldlr*<sup>-/-</sup> mice and about 40% in  
223 *Ldlr*<sup>-/-</sup> *Fgf21*<sup>-/-</sup> mice (Figure 4A, B). The data suggested that anti-atherogenic effect of  
224 CREB3L3 is not mediated primarily through FGF21. CREB3L3 overexpression significantly  
225 reduced plasma TG and FFA levels of *Ldlr*<sup>-/-</sup> mice and even *Ldlr*<sup>-/-</sup> *Fgf21*<sup>-/-</sup> mice. There were  
226 no differences in plasma TC levels among all genotypes. (Figure 4C). As a causative factor  
227 for hyperlipidemia and atherosclerosis in a previous report (Lee *et al.*, 2011), plasma levels  
228 of ApoA4, an LPL modulator, and a CREB3L3 target gene (Lee *et al.*, 2011), were similarly

229 increased in mice overexpressing CREB3L3 in both *Ldlr*<sup>-/-</sup>TgCREB3L3 and  
230 *Ldlr*<sup>-/-</sup>*Fgf21*<sup>-/-</sup>TgCREB3L3 mice (Figure 4D). In gain of function, CREB3L3 target, ApoA4,  
231 but not FGF21, could contribute to the suppressive effects of hepatic CREB3L3 on the  
232 development of atherosclerosis. Taken together with the observations from KO mice, it can  
233 be concluded that CREB3L3 prevents atherosclerosis.

234

235 **CREB3L3 regulates TG metabolism by controlling apolipoproteins in the liver of**  
236 ***Ldlr*<sup>-/-</sup> mice**

237 We next investigated the potential risk factors linking to atherosclerosis-prone  
238 CREB3L3 deficiency, starting with TG metabolism. VLDL secretions from the liver were  
239 significantly increased in *Ldlr*<sup>-/-</sup>*Creb3l3*<sup>-/-</sup> mice (Figure 5—figure supplement 1A). Consistent  
240 with a previous study (*Lee et al. , 2011*), the expression of LPL activators, such as *Apoc2*  
241 and *Apoa5*, was reduced significantly in *Ldlr*<sup>-/-</sup>*Creb3l3*<sup>-/-</sup> mice, whereas the expression of  
242 the LPL inhibitor *Apoc3* was increased (Figure 5A). One of the LPL activators, *Apoa4*,  
243 tended to decrease but not significantly (Figure 5A). These changes contribute to  
244 hypertriglyceridemia by inhibiting LPL activity and impairing TG clearance. In accordance  
245 with decreased plasma LPL activity, TG clearance was decreased remarkably in  
246 *Ldlr*<sup>-/-</sup>*Creb3l3*<sup>-/-</sup> mice (Figure 5—figure supplement 1B, C).

247 In contrast to *Ldlr*<sup>-/-</sup>*Creb3l3*<sup>-/-</sup> mice, hepatic CREB3L3 overexpression significantly  
248 increased hepatic *Apoa4* and *Apoc2* expression (Figure 5B). Consistent with a previous  
249 report (*Chanda et al. , 2013*), CREB3L3 overexpression increased bile acid synthesis-related  
250 gene expression, including *Cyp7a1* and *Cyp8b1* (Figure 5B). *Ldlr*<sup>-/-</sup>TgCREB3L3 mice  
251 exhibited an apparent increase in TG clearance (Figure 5—figure supplement 1E) but no  
252 difference in VLDL secretions compared with *Ldlr*<sup>-/-</sup> mice (Figure 5—figure supplement 1D).  
253 There were no differences in plasma LPL activity between *Ldlr*<sup>-/-</sup> and *Ldlr*<sup>-/-</sup>TgCREB3L3

254 mice (Figure 5—figure supplement 1F). However, changes in apolipoproteins could partially  
255 modulate plasma LPL activity and lead to consequent decrease in plasma TG-rich  
256 lipoprotein levels. FGF21 has also the ability to reduce plasma TG levels (*Schlein et al. ,*  
257 *2016*). Our findings suggest that CREB3L3 activates *Fgf21* and LPL regulatory genes,  
258 resulting in a reduction in plasma TG levels.

259

## 260 **Deficiency of CREB3L3 in the small intestine of *Ldlr*<sup>-/-</sup> mice dysregulates LXR** 261 **signaling**

262 Next, we focused on intestinal lipid metabolism. The expressions of *Lxra/b* and liver  
263 X receptor (LXR) signaling molecules, *Abca1*, *Abcg5*, and *Abcg8*, were significantly  
264 downregulated in the intestines of *Ldlr*<sup>-/-</sup>*Creb3l3*<sup>-/-</sup> mice, whereas *Abcg1* tended to decrease  
265 but not significantly (Figure 5C). Based upon the previous report that intestinal  
266 overexpression of active LXRα in *Ldlr*<sup>-/-</sup> (*Ldlr*<sup>-/-</sup>TgLXRα) mice improves atherosclerosis (*Lo*  
267 *Sasso et al. , 2010*), we also speculated that the suppression of LXR signaling in intestines  
268 of *Ldlr*<sup>-/-</sup>*Creb3l3*<sup>-/-</sup> mice contributed to the acceleration of atherosclerosis. Because  
269 *Ldlr*<sup>-/-</sup>TgLXRα mice consistently exhibited significantly reduced intestinal cholesterol  
270 absorption (*Lo Sasso et al. , 2010*), the increase in intestinal cholesterol absorption in  
271 *Ldlr*<sup>-/-</sup>*Creb3l3*<sup>-/-</sup> mice might depend on the downregulation of LXR signaling in the small  
272 intestine. Reductions in *Abcg5/8*, which increased cholesterol excretion into the intestinal  
273 lumen, also led to cholesterol accumulation in the intestines of *Ldlr*<sup>-/-</sup>*Creb3l3*<sup>-/-</sup> mice. Similar  
274 to the liver, *Apoa4* and *Apoc2* expression were decreased in the small intestines of  
275 *Ldlr*<sup>-/-</sup>*Creb3l3*<sup>-/-</sup> mice (Figure 5C).

276

## 277 **Deficiency of CREB3L3 activates hepatic expressions of SREBP-1 and -2 target genes**

278 **in the liver of *Ldlr*<sup>-/-</sup> mice**

279 To further explore the integral mechanism, we determined hepatic gene expression  
280 profiles of *Creb3l3*<sup>-/-</sup> and hepatic Tg mice (Figure 5A). Consistent with described profiles of  
281 the *Creb3l3*<sup>-/-</sup> mice (Nakagawa et al. , 2014), genes downstream of CREB3L3, including  
282 fatty acid oxidation-related genes such as *Ppara*, *Cpt1a* (carnitine palmitoyltransferase 1a,  
283 liver), and *Fgf21*, were decreased in *Ldlr*<sup>-/-</sup>*Creb3l3*<sup>-/-</sup> mice. Hepatic CREB3L3  
284 overexpression significantly increased hepatic *Ppara* as well as and its target gene  
285 expression, such as those of *Cpt1a* and *Fgf21* in *Ldlr*<sup>-/-</sup> mice (Figure 5B). Lipogenic genes  
286 regulated by SREBP-1c were entirely upregulated in *Ldlr*<sup>-/-</sup>*Creb3l3*<sup>-/-</sup> mice including *Fasn*  
287 (fatty acid synthase), *Scd1* (stearoyl-coenzyme A desaturase 1), *Elovl6* (ELOVL family  
288 member 6, elongation of long-chain fatty acids [yeast]) (Figure 5A). Another SREBP-1 target,  
289 *Pnpla3* (patatin-like phospholipase domain containing 3), which is a central regulator of  
290 hepatic TG metabolism and fat accumulation (Huang et al. , 2010), was also remarkably  
291 increased in *Ldlr*<sup>-/-</sup>*Creb3l3*<sup>-/-</sup> mice (Figure 5A). It was noteworthy that in contrast to marked  
292 induction of target genes, the expression of its encoding gene *Srebf1* only slightly increased.  
293 The expression of cholesterol synthesis genes governed by SREBP-2, such as *Hmgcs1*  
294 (HMGCoA synthase 1), *Hmgcr* (HMGCoA reductase), and *Sqle* (Squalene epoxidase), was  
295 increased in *Ldlr*<sup>-/-</sup>*Creb3l3*<sup>-/-</sup> mice, although the encoding gene *Srebf2* did not exhibit  
296 apparent changes (Figure 5A). These changes in SREBP-related genes implicate the  
297 functional activation of SREBPs at the posttranslational level. In contrast, the expression of  
298 *Srebf3* and its target genes per se was not altered between *Ldlr*<sup>-/-</sup> and *Ldlr*<sup>-/-</sup>TgCREB3L3  
299 mice despite the hepatic overexpression of nuclear, and not full-length, CREB3L3 (Figure  
300 5B).

301

302 **Interaction between CREB3L3 and SREBP in hepatic lipid metabolism**

303 To explain that the hepatic expression of lipogenic and cholesterologenic genes was  
304 strongly upregulated in *Ldlr<sup>-/-</sup>Creb3l3<sup>-/-</sup>* mice without appreciable induction of SREBP  
305 expression, we evaluated the proteolytic cleavage of SREBPs by the amount of precursor  
306 and nuclear SREBP proteins. Western blotting revealed that levels of both premature  
307 (membrane; pSREBP-1) and active (nuclear) forms of SREBP-1 (nSREBP-1) as well as the  
308 active form of SREBP-2 (nSREBP-2) were robustly increased in livers from *Ldlr<sup>-/-</sup>Creb3l3<sup>-/-</sup>*  
309 mice (Figure 6A), which suggests activated proteocleavage of both proteins and warrants  
310 the activation of these target genes. Because SREBPs and CREB3L3 share a set of  
311 proteases (S1P and S2P) involved in the cleavage process of transcriptional activation at  
312 Golgi (*Zhang et al. , 2006*), the cleavage of these proteins may be competitive to each other.  
313 Specifically, we hypothesized that the presence of premature CREB3L3 (pCREB3L3) inhibits  
314 pSREBPs cleavage in a competitive manner. Accordingly, pCREB3L3 expression was  
315 restored in *Ldlr<sup>-/-</sup>Creb3l3<sup>-/-</sup>* mice via infection with adenovirus encoding pCREB3L3 (Ad-  
316 pCREB3L3) to determine whether pCREB3L3 would suppress pSREBP cleavage, thus  
317 reducing nSREBP accumulation. As expected, pCREB3L3 overexpression reduced  
318 nSREBP-1 and nSREBP-2 accumulation in *Ldlr<sup>-/-</sup>Creb3l3<sup>-/-</sup>* mice with only small changes in  
319 *Srebfs* expression (Figure 6B). pCREB3L3 overexpression decreased plasma TG and TC  
320 levels compared with control GFP infected mice (Figure 6B). Genes related to SREBP  
321 cleavage were also investigated. An SREBP cleavage activator, *Scap* was increased in  
322 *Ldlr<sup>-/-</sup>Creb3l3<sup>-/-</sup>* mice (Figure 6C), partly explaining that SREBPs cleavage was activated in  
323 *Ldlr<sup>-/-</sup>Creb3l3<sup>-/-</sup>* mice. Consistent with the previous report, *Insig2a*, a retention factor of  
324 SREBP-SCAP complex in ER, is a target gene for CREB3L3 (*Wang et al. , 2016*), *Insig2a*  
325 was decreased in *Ldlr<sup>-/-</sup>Creb3l3<sup>-/-</sup>* mice (Figure 6C). Other retention factors such as *Insig1*  
326 and *Insig2b* were not changed in both *Ldlr<sup>-/-</sup>Creb3l3<sup>-/-</sup>* mice (Figure 6C), meanwhile  
327 overexpression of nuclear CREB3L3 in *Ldlr<sup>-/-</sup>* mice failed to affect the expression of *Insig*

328 genes (Figure 6C). This discrepancy between loss and gain of CREB3L3 in *Ldlr*<sup>-/-</sup> mice  
329 indicates that CREB3L3-Insig2a pathway is not strong enough to provide an explanation for  
330 the strong SREBP activation by CREB3L3 deficiency, supporting our new hypothesis above.  
331 In a cell-based reporter assay using an SREBP response element (SRE) containing  
332 luciferase (SRE-Luc), endogenous SREBP cleavage activity was detected by transfection  
333 with pSREBP-1a, as evidenced by SRE-Luc activity. Further co-transfection with pCREB3L3  
334 significantly suppressed this pSREBP-1a cleavage, but the active form of CREB3L3  
335 (nCREB3L3) did not (Figure 6D) as another supportive data for competition in the cleavage  
336 between pCREB3L3 and pSREBP.

337

### 338 **Antagonism between CREB3L3 and SREBP occurs at trafficking from ER to Golgi**

339 An immunoprecipitation assay, pCREB3L3 was associated with pSREBP-1c (Figure  
340 6E), indicating a direct association of the two precursor proteins. To determine the effects of  
341 pCREB3L3 on the cellular localization of SREBPs, mCherry-tagged pSREBP-1c, SCAP, with  
342 or without GFP-tagged pCREB3L3 vectors were co-transfected into HEK293 cells.  
343 Immunohistochemistry analysis revealed that SREBP-1c was localized in the nucleus  
344 merging with nuclear marker (DAPI) when co-transfected with SCAP indicating SCAP  
345 enhanced SREBP cleavage and caused its nuclear transfer (Figure 6F). However, when  
346 additionally co-transfected with pCREB3L3, SREBP-1c is then colocalized, merging with  
347 CREB3L3 at least not in nucleus, supporting that their direct binding leads to the  
348 suppression of SREBP cleavage by pCREB3L3 (Figure 6F). Organelle marker co-  
349 transfection indicated that the co-localization of SREBP-1 and CREB3L3 occurs at the ER  
350 because both proteins and the ER marker (Calnexin) were all merged (Figure 6G). Without  
351 CREB3L3, SREBP-1c and SCAP are dissociated in the nucleus and ER, respectively  
352 (Figure 6G). Golgi marker (GM130) in SREBP-1c/SCAP transfection showed a partial signal

353 of SREBP-1c merging at Golgi, presumably a remnant of the uncleaved one and the other  
354 partial signal of unmerged one presumably cleaved into the nucleus (Figure 6H). SREBP-  
355 1c/SCAP/CREB3L3 co-transfection caused only marginal signaling merge of SREBP-1c-  
356 CREB3L3 at Golgi (Figure 6H). The data indicate that CREB3L3 inhibited SCAP escort of  
357 SREBP-1c to Golgi by forming the complex, which remained in the ER, thus not allowing the  
358 entry of SREBP-1c to the Golgi. To further investigate whether pCREB3L3 disturbs the  
359 pSREBPs-S1P complex we used an *in situ* microscopy approach using a proximity ligation  
360 assay (PLA). HSV-tagged pSREBP-1c and Halo-tagged S1P were co-transfected into  
361 HEK293 cells. Complexes between pSREBP-1c and S1P were observed as red dots around  
362 the nucleus (Figure 6I). As CREB3L3 inhibited its complex formation, the red dots were  
363 decreased significantly in addition to pCREB3L3 transfection (Figure 6I), which indicates that  
364 pCREB3L3 inhibited the formation of the complex between pSREBP-1c and S1P. These  
365 findings suggest that the physical association of CREB3L3 with SREBPs inhibits the SCAP-  
366 mediated transport of SREBP-1 from the ER to the Golgi, the processing by S1P, and  
367 consequently SREBP transcriptional activity. To verify vice versa observation: whether  
368 CREB3L3 cleavage is conversely inhibited by SREBP, we evaluated nCREB3L3 protein  
369 levels in *Srebf1*<sup>-/-</sup> mice. Hepatic nCREB3L3 protein levels in *Srebf1*<sup>-/-</sup> mice were clearly  
370 increased compared with WT mice (Figure 6J). These results support that CREB3L3 and  
371 SREBP-1 can antagonize each other by the direct mutual interaction at the precursor protein  
372 level.

373

## 374 Discussion

375 The current study clearly exhibited that CREB3L3 has impacts on atherosclerotic  
376 phenotypes so profoundly that gain- and loss-of-function experiments of a single molecule to  
377 date have never shown. *Creb3l3* deletion caused both hypertriglyceridemia and



378 hypercholesterolemia and accelerated aortic atheroma formation in *Ldlr*<sup>-/-</sup> mice fed either a  
379 WD or a normal diet, irrespective of gender, and from both hepatic and intestinal origins.  
380 Conversely, hepatic nuclear CREB3L3 overexpression strikingly attenuated WD-induced  
381 hyperlipidemia and atherosclerosis progression in *Ldlr*<sup>-/-</sup> mice. As many pieces of literature  
382 including ours and the present work confirmed that the primary role of CREB3L3 is  
383 regulation of TG metabolism (*Lee et al. , 2011, Nakagawa et al. , 2016a, Nakagawa et al. ,*  
384 *2016b, Nakagawa et al. , 2014, Satoh et al. , 2020*), TG per se has been questioned as the  
385 major atherosclerosis risk factor, highlighting the cholesterol-related or more comprehensive  
386 mechanisms for potential mechanisms of anti-atherogenic effects of CREB3L3 .

387         In the process of clarifying the causative mediators for the anti-atherogenic effect of  
388 CREB3L3, FGF21, a major hepatic CREB3L3 target gene which regulates both lipid and  
389 glucose metabolism, had been a strong candidate because it was reported to ameliorate  
390 atherosclerosis and show hepatic activation of SREBP-2 in *Apoe*<sup>-/-</sup>*Fgf21*<sup>-/-</sup> mice (*Lin et al. ,*  
391 *2015, Wu et al. , 2014*). Although the current study also showed that some metabolic  
392 phenotypes observed in *Ldlr*<sup>-/-</sup>*Creb3l3*<sup>-/-</sup> mice were attributed to decreases in plasma  
393 FGF21 levels, deficiency of *Fgf21* in *Ldlr*<sup>-/-</sup>TgCREB3L3 mice did not cancel atherosclerosis  
394 improvement, distracting the hypothesis that FGF21 is the main contributor of anti-  
395 atherosclerosis.

396         The intestine-specific CREB3L3 KO mice also exhibited atheroma formation, which  
397 was comparable to liver-specific KO mice, confirming the role of intestinal CREB3L3 in the  
398 anti-atherogenic action. Decreased LXR signaling and increased lipid contents were  
399 observed in the intestines of *Ldlr*<sup>-/-</sup>*Creb3l3*<sup>-/-</sup> mice. Intestinal-specific active form of LXR  
400 overexpression in *Ldlr*<sup>-/-</sup> mice on a WD increased fecal neutral sterol excretion and exhibited  
401 protection against atherosclerosis (*Lo Sasso et al. , 2010*), supporting the hypothesis that  
402 intestinal CREB3L3 contributes to cholesterol metabolism via LXR. *Ldlr*<sup>-/-</sup>*Creb3l3*<sup>-/-</sup> mice

403 had higher plasma plant sterol levels than *Ldlr*<sup>-/-</sup> mice, explaining that the deficiency of  
404 *Creb3l3* in the small intestine increases cholesterol absorption. Collectively, the data suggest  
405 that both liver- and intestine-specific CREB3L3 deficiency additively promote  
406 atherosclerosis.

407 We showed that *Creb3l3* deficiency increases levels of hepatic nSREBPs and,  
408 consequently, of plasma lipids, which led us to speculate and confirm that CREB3L3  
409 physically competes with SREBPs in respect to ER to Golgi trafficking for cleavage by S1P  
410 and S2P. It can be interpreted that CREB3L3 deletion leads to primarily decreased TG  
411 catabolism by per se and enhanced lipogenesis as a secondary consequence of SREBP-1c  
412 activation, leading to a marked accumulation of TG-rich remnant lipoproteins and severe  
413 hypertriglyceridemia. In addition, both increased cholesterol absorption due to absence of  
414 intestinal CREB3L3 and cholesterol synthesis mediated by SREBP-2 activation in the liver  
415 significantly enriched these lipoproteins with cholesterol and played a major role in the  
416 production of more atherogenic lipoproteins.

417 Functional competition between SREBPs and CREB3L3 implicates profound  
418 physiological consequences for lipid and energy regulation. CREB3L3 and SREBPs use the  
419 same activation process, regulated intramembrane proteolysis, by which transmembrane  
420 proteins are cleaved to release cytosolic domains that translocate into the nucleus and  
421 thereby regulate gene transcription. CREB3L3 is cleaved by the processing enzymes, S1P  
422 and S2P, in the Golgi apparatus in a manner similar to SREBPs cleavage (*Zhang et al.* ,  
423 2006). Therefore, we initially hypothesized that pCREB3L3 would competitively inhibit  
424 SREBP processing. We showed that CREB3L3 and SREBP-1c are physically interacted  
425 (Fig. 6A). It is likely to inhibit trafficking of SREBP-CREB3L3 complex to Golgi, although we  
426 could not observe the immunoprecipitation assay of CREB3L3-Insig (data not shown). We  
427 have not confirmed complex formation of the three molecules and whether Insig is involved

428 in this potential complex. Precise molecular mechanism needs to be clarified in future.  
429 Recently, it was reported that CREB3L3 increases *Insig-2a* expression, which in turn  
430 suppresses SREBP activation (*Wang et al. , 2016*). Consistently, its expression was  
431 decreased in the livers of *Ldlr<sup>-/-</sup>Creb3l3<sup>-/-</sup>* mice, but not changed in *Ldlr<sup>-/-</sup>TgCREB3L3* mice.  
432 Additionally, *Ldlr<sup>-/-</sup>TgCREB3L3* mice (overexpression of nCREB3L3) did not exhibit apparent  
433 altered SREBPs and their target gene activation in the liver. Certainly, adenoviral  
434 overexpression of pCREB3L3 in the livers of *Ldlr<sup>-/-</sup>Creb3l3<sup>-/-</sup>* mice reduced nSREBP-1 and  
435 nSREBP-2 protein expression (Figure 6B), indicating that in *Ldlr<sup>-/-</sup>* mice, SREBP cleavage  
436 was regulated by existence of pCREB3L3, rather than Insigs. It was reported that CREB3L3  
437 suppresses LXR $\alpha$ -induced *Srebf-1c* expression by inhibiting LXR $\alpha$  binding to *Srebf-1c*  
438 promoter (*Min et al. , 2013*); however, in our data settings, *Ldlr<sup>-/-</sup>TgCREB3L3* mice exhibited  
439 no changes in *Srebf1c* and its target genes.

440 We propose the new concept that pCREB3L3 and pSREBPs physically interact at  
441 the ER and inhibit transportation of SREBPs to the Golgi apparatus, and even if transferred,  
442 competes with SREBPs in access to S1P in the Golgi apparatus. Loss of this interaction due  
443 to CREB3L3 deficiency induces SREBP-1 and -2 cleavage and promotes TG and  
444 cholesterol synthesis induction (Figure 6K). This mechanism also explains why the  
445 overexpression of nuclear CREB3L3 did not suppress hepatic SREBP target genes (Figure  
446 5B), because nuclear CREB3L3 does not compete with pSREBPs. In the normal liver,  
447 *Creb3l3* is upregulated during fasting and conversely, downregulated under fed conditions,  
448 while *Srebf1c* is regulated in the reciprocal way. Thus, the encounter of the two factors does  
449 not actively occur on the ER under normal nutritional states. However, in metabolic  
450 disturbances with high atherogenic risks, such as *db/db* or *ob/ob* mice, two factors could be  
451 expressed collaterally (*Nakagawa et al. , 2014*) and interact with and inhibit each other.  
452 Finally, enhancement of nCREB3L3 with decreased pCREB3L3 in *Srebf1<sup>-/-</sup>* liver (Figure 6J)

453 supports this hypothesis. Functional antagonism between CREB3L3 and SREBPs is  
454 consistent in atherosclerosis based upon the anti-atherogenic action of CREB3L3 from the  
455 current data and pro-atherogenic action of SREBP-1 from our previous work (*Karasawa et*  
456 *al. , 2011*). CREB3L3 and SREBPs are regulators of catabolism and anabolism of lipids,  
457 respectively, it is conceivable to configure a mechanism by which mutual interaction and  
458 balance of the counterparts maintain the whole-body energy balance and atherosclerosis  
459 risks.

460 Collectively, our study is the first to identify the crucial role of CREB3L3  
461 enterohepatic interplay in lipid metabolism and atherosclerosis prevention. CREB3L3 could  
462 be a new atherosclerosis target. Protection from atherosclerosis by overexpressed nuclear  
463 CREB3L3 mice was more than expected from the amelioration of hyperlipidemia in  
464 *Ldlr<sup>-/-</sup>TgCREB3L3* mice. CREB3L3 is deeply involved in cellular stress and inflammation,  
465 which we have not investigated in the current study. Therefore, further study is warranted in  
466 these aspects.

467

## 468 **Materials and Methods**

### 469 **Mice**

470 This project was approved and conducted under the guidelines of the Animal Care  
471 Committee of the University of Tsukuba. *Creb3l3<sup>tm1.1Sad/J</sup>* (*Creb3l3<sup>-/-</sup>*) mice (*Luebke-Wheeler*  
472 *et al.*, 2008) and *Ldlr<sup>-/-</sup>* mice (*Ishibashi et al.*, 1993) were purchased from Jackson Laboratory  
473 (Bar Harbor, ME, USA). *Creb3l3<sup>-/-</sup>* mice were crossed onto an *Ldlr<sup>-/-</sup>* background to generate  
474 *Ldlr<sup>-/-</sup>Creb3l3<sup>-/-</sup>* mice. Transgenic mice overexpressing amino acids 1–320 of human  
475 CREB3L3 under control of the phosphoenolpyruvate carboxykinase promoter on the  
476 C57BL/6J background (hereafter referred to as TgCREB3L3) were generated as previously  
477 described (*Nakagawa et al.*, 2014). *Fgf21<sup>-/-</sup>* mice were kindly provided by Prof. Morichika  
478 Konishi and Nobuyuki Ito (*Hotta et al.*, 2009). TgCREB3L3 mice were crossed with *Ldlr<sup>-/-</sup>*  
479 mice to produce *Ldlr<sup>-/-</sup>TgCREB3L3* mice and then crossed with *Fgf21<sup>-/-</sup>* mice to produce  
480 *Ldlr<sup>-/-</sup>Fgf21<sup>-/-</sup>TgCREB3L3* mice. *Creb3l3<sup>flox/flox</sup>* (flox) mice were generated using the  
481 CRISPR/Cas 9 system as previously described (*Nakagawa et al.*, 2016a). Flox mice were  
482 crossed with B6.Cg-Tg(Alb-Cre)21Mgn/J (albumin Cre Tg, from Jackson Lab) (*Yakar et al.*,  
483 1999) and/or villin Cre Tg mice (from Jackson Lab) (*Madison et al.*, 2002) to produce liver-  
484 specific CREB3L3 knockout (LKO), small intestine-specific CREB3L3 knockout (IKO), and  
485 both liver- and small intestine-specific CREB3L3 knockout (DKO) mice. These mice were  
486 crossed with *Ldlr<sup>-/-</sup>* mice generating *Ldlr<sup>-/-</sup>flox*, *Ldlr<sup>-/-</sup>LKO*, *Ldlr<sup>-/-</sup>IKO*, and *Ldlr<sup>-/-</sup>DKO* mice,  
487 respectively. *Srebf1<sup>-/-</sup>* mice were generated as previously described (*Shimano et al.*, 1997).  
488 Sixteen-week-old male WT and *Srebf1<sup>-/-</sup>* mice were fasted for 24 hrs and then fed with high-  
489 sucrose diet for 12 hrs (*Nakagawa et al.*, 2006). All mice were maintained on normal chow  
490 (Oriental Yeast Company, Tokyo, Japan) and a 14-h light/10-h dark cycle. For atherosclerosis  
491 analyses, mice were fed WD (D12079B [34% sucrose, 21% fat, 0.15% cholesterol], Research  
492 Diet) under the indicated terms (*Karasawa et al.*, 2011). For adenoviral infection, 8- to 10-

493 week-old female *Ldlr*<sup>-/-</sup>*Creb3l3*<sup>-/-</sup> mice were infected with the indicated adenovirus at 1.0 (low)  
494 and 5.0 (high dose)  $\times 10^8$  pfu/g body weight (BW); samples were collected 6 days later while  
495 in a fed state. All animal husbandry procedures and animal experiments were consistent with  
496 the University of Tsukuba Regulations of Animal Experiment and were approved by the Animal  
497 Experiment Committee of the University of Tsukuba.

498

#### 499 **Determination of metabolic parameters**

500 Plasma levels of glucose, triglycerides (TG), TC, FFA, alanine aminotransferase  
501 (ALT), and aspartate aminotransferase (AST) were measured using Wako enzymatic kits  
502 (Wako Pure Chemical Industries). Plasma insulin was measured with a mouse insulin enzyme-  
503 linked immunosorbent assay (ELISA) kit (Sibayagi). Plasma FGF21 was measured with a  
504 mouse/rat FGF21 Quantikine ELISA kit (R&D Systems). Hepatic TG and TC contents were  
505 measured as previously described (*Nakagawa et al. , 2006*). Intestinal TG and TC contents  
506 were measured using the same protocol. Plasma ApoA4 was detected by western blotting with  
507 an anti-ApoA4 antibody (sc-19036; Santa Cruz Biotechnology).

508

#### 509 **HPLC analysis**

510 For lipoprotein distribution analysis, pooled plasma samples from four to five mice per  
511 group were analyzed via upgraded HPLC analysis as previously described (Skylight Biotech  
512 Inc.) (*Okazaki et al. , 2005*).

513

#### 514 **Isolation of VLDL fraction**

515 VLDL ( $d < 1.006$  g/ml) was isolated via ultracentrifugation with a TLA120.2 rotor  
516 (Beckman Coulter). VLDL fractions were separated by sodium dodecyl sulfate (SDS)-  
517 polyacrylamide gel electrophoresis (PAGE) and subjected to Coomassie brilliant blue staining.

518

### 519 **Determination of plasma sterol levels**

520 For sterol distribution analysis, pooled plasma samples were quantified using a gas  
521 chromatography method (Skylight Biotech).

522

### 523 **Immunoblotting**

524 Total cell and nuclear fraction lysates were prepared as previously described (*Ide et*  
525 *al. , 2004*), separated by SDS-PAGE, and subjected to western blot analysis using antibodies  
526 against SREBP-1 (sc-12332; Santa Cruz), SREBP-2 (10007663; Cayman Chemical),  $\alpha$ -  
527 Tubulin (05-829; Millipore), Lamin A/C (#2032, Cell Signaling Technologies), V5 (R960; Life  
528 Technologies), HSV (69171-3; Novagen), and HA (3F10) (Roche) antibodies.

529

### 530 **Immunoprecipitation**

531 HEK293 cells were maintained in Dulbecco's modified Eagle's medium  
532 supplemented with 10% fetal bovine serum and penicillin/streptomycin. Indicated plasmids  
533 were transfected with X-tremeGENE 9 (Roche) according to the manufacturer's instructions.  
534 V5-tagged full-length mouse *Creb3/3* cDNA was inserted into pcDNA3.1 (Invitrogen); GFP-  
535 tagged full-length mouse *Creb3/3* cDNA was inserted into pEGFP (GFP-CREB3L3) (Clontech),  
536 mCherry-tagged human SREBP-1c was inserted into pmCherry (mCherry-SREBP-1c)  
537 (Clontech), and HA-tagged hamster SCAP, HSV-tagged human SREBP-1c and HSV-tagged  
538 human SREBP-2 were inserted into pCMV. Cell lysates were immunoprecipitated with  
539 antibodies against V5 and immunoprecipitants were subjected to immunoblotting with the  
540 indicated antibodies as previously described (*Nakagawa et al. , 2014*).

541

### 542 **Duolink proximity ligation (PLA) assay**

543 HEK293 cells were co-transfected with HSV-tagged pSREBP-1c and Halo-tagged  
544 S1P with/without pCREB3L3. Cells were fixed with 3.7% formalin in PBS for 30 min before  
545 being permeabilized with 0.2% Triton X-100 in PBS for 10 min. Cells were then subjected to  
546 the PLA assay using the Duolink red kit (Sigma-Aldrich) according to the manufacturer's  
547 instructions.

548

### 549 **Immunocytochemistry**

550 HEK293 cells were transfected with mCherry-tagged pSREBP-1c, SCAP, and GFP-  
551 tagged pCREB3L3 using X-tremeGENE 9 (Roche). Cells were grown on coverslips, fixed with  
552 4 % paraformaldehyde for 15min, and permeabilized with 0.1 % Triton X-100 for 5min. After  
553 blocking in 1% BSA for 30min, the cells were incubated with primary and secondary antibodies  
554 for 1h each. The ER and Golgi apparatus were stained using anti-Calnexin (610523, BD  
555 Biosciences) and anti-GM130 antibodies (610822, BD Biosciences), respectively.  
556 Immunoreactive complexes were visualized with Alexa Fluor 405-conjugated secondary  
557 antibody (ab175660, Abcam) and nuclei were visualized by staining with 4',6-diamidino-2-  
558 phenylindole.

559

### 560 **Promoter analysis**

561 HEK293 cells were transfected with the indicated luciferase reporter, expression  
562 plasmids, and a reference pRL-SV40 plasmid (Promega) using X-tremeGENE 9 (Roche).  
563 SRE-luc vector (*Ide et al. , 2004, Ide et al. , 2003, Yoshikawa et al. , 2003*) and human SREBP-  
564 1a<sup>41,42</sup> were described previously. After a 48-h incubation, firefly luciferase activity in cells was  
565 measured and normalized to *Renilla* luciferase activity.

566

### 567 **Atherosclerotic lesion analysis**



568 Ten ~ eleven-week-old male and female *Ldlr*<sup>-/-</sup> and *Ldlr*<sup>-/-</sup>*Creb3l3*<sup>-/-</sup> mice were fed a  
569 WD containing 34% sucrose, 21% fat, and 0.15% cholesterol (D12079B; Research Diet) for 5  
570 weeks and 3 months. Ten–eleven-week-old male *Ldlr*<sup>-/-</sup> and *Ldlr*<sup>-/-</sup>TgCREB3L3 mice were fed  
571 a WD for 3 months. Mice were subsequently euthanized to extract their hearts and aortas.  
572 Hearts were fixed in 4% formalin for >48 h. The basal half of each heart was embedded in  
573 Tissue-Tek OCT compound (Sakura Finetek). Cross-sections were stained with Oil Red O and  
574 hematoxylin. Aortas were cut along the midline from the iliac arteries to the aortic root, pinned  
575 flat, and treated with Sudan IV for 15 min to stain lesions, followed by 70% ethanol destaining  
576 and fixation in 4% phosphate-buffered formalin(Karasawa *et al.* , 2011). Atherosclerotic lesions  
577 were quantified using Photoshop CS software (Adobe Systems Inc.).

578

#### 579 **TG production**

580 Mice were deprived of food for 24 h and subsequently injected with Triton WR-1339  
581 (0.5 mg/g BW; Sigma-Aldrich) via the tail veins to block the clearance of nascent ApoB-  
582 containing lipoproteins. Blood samples were collected at 0, 30, 60, and 120 min post-injection  
583 (Karasawa *et al.* , 2011).

584

#### 585 **Postprandial TG response**

586 Mice were deprived of food for 16 h, followed by oral administration of 200 µl of olive  
587 oil(Lee *et al.* , 2011). Blood samples were collected at 0, 3, 6, and 9 h post-administration.

588

#### 589 **Intestinal TG absorption**

590 Mice were fasted for 3 h and injected with Triton WR-1339 (1 mg/g BW, Sigma-  
591 Aldrich) via the tail veins. After 2 h injection, mice were administrated with 100 µl of Olive Oil  
592 orally (Uchida *et al.* , 2012). Blood samples were collected for up to 3 h after the injection.

593

#### 594 **Determination of plasma LPL activity**

595 Mice were injected with 100 U/kg BW of heparin (Novo Heparin, Mochida  
596 Pharmaceutical Co., Ltd) via the tail veins. Blood samples were collected at 20 min post-  
597 administration. Plasma LPL activity was determined using an LPL activity assay kit (Roar  
598 Biochemical, Inc) according to the manufacturer's instructions.

599

#### 600 **Preparation of recombinant adenovirus**

601 cDNAs encoding human full-length of CREB3L3 (NM\_032607.2) and green  
602 fluorescent protein were cloned into pENTR4 vectors (Life Technologies). In addition,  
603 adenovirus vectors were recombined with pAd/CMV/V5-DEST vectors (Life Technologies).  
604 Recombinant adenoviruses were produced in 293A cells (Invitrogen) and purified via CsCl  
605 gradient centrifugation, as previously described (*Nakagawa et al. , 2006*).

606

#### 607 **Analysis of gene expression**

608 Total RNA was isolated from cells and tissues using Trizol reagent (Invitrogen) and  
609 Sepasol (Nacalai). Real-time PCR analysis templates were prepared via cDNA synthesis  
610 (Invitrogen) from total RNA. Real-time PCR was performed using the ABI Prism 7300 System  
611 (Applied Biosystems, Inc) with SYBR Green Master Mix (Roche) and TB Green Premix EX  
612 Taq II (TAKARA Bio) (*Fujimoto et al. , 2013*). Primer sequences are described in  
613 Supplementary Table 1.

614

#### 615 **Statistical analyses**

616 Statistical significance was determined using unpaired Student's *t*-tests and one-way  
617 ANOVA with Tukey's post hoc using the GraphPad Prism software. Differences with *p* values

618 <0.05 were considered significant. Data are expressed as means  $\pm$  standard errors of the  
619 mean

620

## 621 **Acknowledgements**

622 The authors would like to thank Enago ([www.enago.jp](http://www.enago.jp)) for the English language  
623 review. This work was supported by Grants-in-Aid from the Ministry of Science, Education,  
624 Culture and Technology of Japan (25282214 and 16H03253, to Y.N., and 17H06395 and  
625 18H04051 to H.Shimano), AMED-CREST (to Y.N. and H.Shimano), Japan Heart  
626 Foundation/Novartis Grant for Research Award on Molecular and Cellular Cardiology (to  
627 Y.N.), Uehara Memorial Foundation (to Y.N.), Ono Medical Research Foundation (to Y.N.),  
628 Mochida Memorial Foundation for Medical and Pharmaceutical Research (to Y.N.), Suzuken  
629 Memorial Foundation (to Y.N.), Senshin Medical Research Foundation (to Y.N.), Takeda  
630 Science Foundation (to Y.N.), Japan Foundation for Applied Enzymology (to Y.N.), Banyu  
631 Life Science Foundation International (to Y.N.), and Yamaguchi Endocrine Research  
632 Foundation (to Y.N.).

633

## 634 **Author contributions**

635 Y.N. and H.Shimano designed the experiments and wrote the manuscript. Y.N.,  
636 Y.W., S-I.H., K.O., A.O., Y.Y., K.K., H.O., Y.Mizunoe, and M.A. performed the experiments.  
637 M.K. and N.I. generated *Fgf21*<sup>-/-</sup> mice. Y.O., Y.Murayama, H.I., T.M., and H.Sone were  
638 involved in project planning. N.Yamada supervised this study and contributed crucial ideas to  
639 the project.

640

## 641 **Declaration of interests**

642           The authors declare no competing interests.

643

644

645 **References**

- 646 Chanda D, Kim YH, Li T, Misra J, Kim DK, Kim JR, Kwon J, Jeong WI, Ahn SH, Park TS, Koo SH,  
647 Chiang JY, Lee CH, Choi HS. 2013. Hepatic cannabinoid receptor type 1 mediates alcohol-  
648 induced regulation of bile acid enzyme genes expression via CREBH. *PLoS One* **8**:e68845.  
649 DOI: 10.1371/journal.pone.0068845, PMID: PMC3718807
- 650 Chen CH, Albers JJ. 1985. Activation of lecithin: cholesterol acyltransferase by apolipoproteins E-2, E-  
651 3, and A-IV isolated from human plasma. *Biochim Biophys Acta* **836**:279-285. DOI:  
652 10.1016/0005-2760(85)90131-6
- 653 Cohen RD, Castellani LW, Qiao JH, Van Lenten BJ, Lusis AJ, Reue K. 1997. Reduced aortic lesions  
654 and elevated high density lipoprotein levels in transgenic mice overexpressing mouse  
655 apolipoprotein A-IV. *J Clin Invest* **99**:1906-1916. DOI: 10.1172/JCI119358, PMID: PMC508015
- 656 Danno H, Ishii KA, Nakagawa Y, Mikami M, Yamamoto T, Yabe S, Furusawa M, Kumadaki S,  
657 Watanabe K, Shimizu H, Matsuzaka T, Kobayashi K, Takahashi A, Yatoh S, Suzuki H,  
658 Yamada N, Shimano H. 2010. The liver-enriched transcription factor CREBH is nutritionally  
659 regulated and activated by fatty acids and PPARalpha. *Biochem Biophys Res Commun*  
660 **391**:1222-1227. DOI: S0006-291X(09)02419-X [pii]  
661 10.1016/j.bbrc.2009.12.046
- 662 Duverger N, Tremp G, Caillaud JM, Emmanuel F, Castro G, Fruchart JC, Steinmetz A, Deneffe P.  
663 1996. Protection against atherogenesis in mice mediated by human apolipoprotein A-IV.  
664 *Science* **273**:966-968. DOI: 10.1126/science.273.5277.966
- 665 Fisher FM, Kleiner S, Douris N, Fox EC, Mepani RJ, Verdeguer F, Wu J, Kharitonov A, Flier JS,  
666 Maratos-Flier E, Spiegelman BM. 2012. FGF21 regulates PGC-1alpha and browning of white  
667 adipose tissues in adaptive thermogenesis. *Genes Dev* **26**:271-281. DOI:  
668 10.1101/gad.177857.111, PMID: 3278894
- 669 Fournier N, Atger V, Paul JL, Sturm M, Duverger N, Rothblat GH, Moatti N. 2000. Human ApoA-IV  
670 overexpression in transgenic mice induces cAMP-stimulated cholesterol efflux from J774  
671 macrophages to whole serum. *Arterioscler Thromb Vasc Biol* **20**:1283-1292
- 672 Fujimoto Y, Nakagawa Y, Satoh A, Okuda K, Shingyouchi A, Naka A, Matsuzaka T, Iwasaki H,  
673 Kobayashi K, Yahagi N, Shimada M, Yatoh S, Suzuki H, Yogosawa S, Izumi T, Sone H,  
674 Urayama O, Yamada N, Shimano H. 2013. TFE3 controls lipid metabolism in adipose tissue  
675 of male mice by suppressing lipolysis and thermogenesis. *Endocrinology* **154**:3577-3588.  
676 DOI: 10.1210/en.2013-1203
- 677 Hotta Y, Nakamura H, Konishi M, Murata Y, Takagi H, Matsumura S, Inoue K, Fushiki T, Itoh N. 2009.  
678 Fibroblast growth factor 21 regulates lipolysis in white adipose tissue but is not required for  
679 ketogenesis and triglyceride clearance in liver. *Endocrinology* **150**:4625-4633. DOI:  
680 10.1210/en.2009-0119
- 681 Huang Y, He S, Li JZ, Seo YK, Osborne TF, Cohen JC, Hobbs HH. 2010. A feed-forward loop  
682 amplifies nutritional regulation of PNPLA3. *Proc Natl Acad Sci U S A* **107**:7892-7897. DOI:

- 683 10.1073/pnas.1003585107, PMID: PMC2867902
- 684 Ide T, Shimano H, Yahagi N, Matsuzaka T, Nakakuki M, Yamamoto T, Nakagawa Y, Takahashi A,  
685 Suzuki H, Sone H, Toyoshima H, Fukamizu A, Yamada N. 2004. SREBPs suppress IRS-2-  
686 mediated insulin signalling in the liver. *Nat Cell Biol* **6**:351-357. DOI: 10.1038/ncb1111  
687 ncb1111 [pii]
- 688 Ide T, Shimano H, Yoshikawa T, Yahagi N, Amemiya-Kudo M, Matsuzaka T, Nakakuki M, Yatoh S,  
689 Iizuka Y, Tomita S, Ohashi K, Takahashi A, Sone H, Gotoda T, Osuga J, Ishibashi S, Yamada  
690 N. 2003. Cross-talk between peroxisome proliferator-activated receptor (PPAR) alpha and  
691 liver X receptor (LXR) in nutritional regulation of fatty acid metabolism. II. LXRs suppress lipid  
692 degradation gene promoters through inhibition of PPAR signaling. *Mol Endocrinol* **17**:1255-  
693 1267. DOI: 10.1210/me.2002-0191
- 694 Ishibashi S, Brown MS, Goldstein JL, Gerard RD, Hammer RE, Herz J. 1993. Hypercholesterolemia in  
695 low density lipoprotein receptor knockout mice and its reversal by adenovirus-mediated gene  
696 delivery. *J Clin Invest* **92**:883-893. DOI: 10.1172/JCI116663, PMID: PMC294927
- 697 Karasawa T, Takahashi A, Saito R, Sekiya M, Igarashi M, Iwasaki H, Miyahara S, Koyasu S,  
698 Nakagawa Y, Ishii K, Matsuzaka T, Kobayashi K, Yahagi N, Takekoshi K, Sone H, Yatoh S,  
699 Suzuki H, Yamada N, Shimano H. 2011. Sterol regulatory element-binding protein-1  
700 determines plasma remnant lipoproteins and accelerates atherosclerosis in low-density  
701 lipoprotein receptor-deficient mice. *Arterioscler Thromb Vasc Biol* **31**:1788-1795. DOI:  
702 10.1161/ATVBAHA.110.219659
- 703 Kikuchi T, Orihara K, Oikawa F, Han SI, Kuba M, Okuda K, Satoh A, Osaki Y, Takeuchi Y, Aita Y,  
704 Matsuzaka T, Iwasaki H, Yatoh S, Sekiya M, Yahagi N, Suzuki H, Sone H, Nakagawa Y,  
705 Yamada N, Shimano H. 2016. Intestinal CREBH overexpression prevents high-cholesterol  
706 diet-induced hypercholesterolemia by reducing Npc1l1 expression. *Mol Metab* **5**:1092-1102.  
707 DOI: 10.1016/j.molmet.2016.09.004, PMID: 5081412
- 708 Kim H, Mendez R, Zheng Z, Chang L, Cai J, Zhang R, Zhang K. 2014. Liver-enriched transcription  
709 factor CREBH interacts with peroxisome proliferator-activated receptor alpha to regulate  
710 metabolic hormone FGF21. *Endocrinology* **155**:769-782. DOI: 10.1210/en.2013-1490, PMID:  
711 3929740
- 712 Kokkinos J, Tang S, Rye KA, Ong KL. 2017. The role of fibroblast growth factor 21 in atherosclerosis.  
713 *Atherosclerosis* **257**:259-265. DOI: 10.1016/j.atherosclerosis.2016.11.033
- 714 Lee JH, Giannikopoulos P, Duncan SA, Wang J, Johansen CT, Brown JD, Plutzky J, Hegele RA,  
715 Glimcher LH, Lee AH. 2011. The transcription factor cyclic AMP-responsive element-binding  
716 protein H regulates triglyceride metabolism. *Nat Med* **17**:812-815. DOI: nm.2347 [pii]  
717 10.1038/nm.2347
- 718 Lin Z, Pan X, Wu F, Ye D, Zhang Y, Wang Y, Jin L, Lian Q, Huang Y, Ding H, Triggle C, Wang K, Li X,  
719 Xu A. 2015. Fibroblast growth factor 21 prevents atherosclerosis by suppression of hepatic  
720 sterol regulatory element-binding protein-2 and induction of adiponectin in mice. *Circulation*

- 721           **131**:1861-1871. DOI: 10.1161/CIRCULATIONAHA.115.015308
- 722   Liu SQ, Roberts D, Kharitononkov A, Zhang B, Hanson SM, Li YC, Zhang LQ, Wu YH. 2013.
- 723           Endocrine protection of ischemic myocardium by FGF21 from the liver and adipose tissue. *Sci*
- 724           *Rep* **3**:2767. DOI: 10.1038/srep02767, PMID: PMC3783882
- 725   Lo Sasso G, Murzilli S, Salvatore L, D'Errico I, Petruzzelli M, Conca P, Jiang ZY, Calabresi L, Parini P,
- 726           Moschetta A. 2010. Intestinal specific LXR activation stimulates reverse cholesterol transport
- 727           and protects from atherosclerosis. *Cell Metab* **12**:187-193. DOI: 10.1016/j.cmet.2010.07.002
- 728   Luebke-Wheeler J, Zhang K, Battle M, Si-Tayeb K, Garrison W, Chhinder S, Li J, Kaufman RJ,
- 729           Duncan SA. 2008. Hepatocyte nuclear factor 4alpha is implicated in endoplasmic reticulum
- 730           stress-induced acute phase response by regulating expression of cyclic adenosine
- 731           monophosphate responsive element binding protein H. *Hepatology* **48**:1242-1250. DOI:
- 732           10.1002/hep.22439, PMID: 2717709
- 733   Madison BB, Dunbar L, Qiao XT, Braunstein K, Braunstein E, Gumucio DL. 2002. Cis elements of the
- 734           villin gene control expression in restricted domains of the vertical (crypt) and horizontal
- 735           (duodenum, cecum) axes of the intestine. *J Biol Chem* **277**:33275-33283. DOI:
- 736           10.1074/jbc.M204935200
- 737   Matthan NR, Giovanni A, Schaefer EJ, Brown BG, Lichtenstein AH. 2003. Impact of simvastatin,
- 738           niacin, and/or antioxidants on cholesterol metabolism in CAD patients with low HDL. *J Lipid*
- 739           *Res* **44**:800-806. DOI: 10.1194/jlr.M200439-JLR200
- 740   Min AK, Jeong JY, Go Y, Choi YK, Kim YD, Lee IK, Park KG. 2013. cAMP response element binding
- 741           protein H mediates fenofibrate-induced suppression of hepatic lipogenesis. *Diabetologia*
- 742           **56**:412-422. DOI: 10.1007/s00125-012-2771-2
- 743   Nakagawa Y, Oikawa F, Mizuno S, Ohno H, Yagishita Y, Satoh A, Osaki Y, Takei K, Kikuchi T, Han SI,
- 744           Matsuzaka T, Iwasaki H, Kobayashi K, Yatoh S, Yahagi N, Isaka M, Suzuki H, Sone H,
- 745           Takahashi S, Yamada N, Shimano H. 2016a. Hyperlipidemia and hepatitis in liver-specific
- 746           CREB3L3 knockout mice generated using a one-step CRISPR/Cas9 system. *Sci Rep*
- 747           **6**:27857. DOI: 10.1038/srep27857, PMID: PMC4904192
- 748   Nakagawa Y, Satoh A, Tezuka H, Han SI, Takei K, Iwasaki H, Yatoh S, Yahagi N, Suzuki H, Iwasaki Y,
- 749           Sone H, Matsuzaka T, Yamada N, Shimano H. 2016b. CREB3L3 controls fatty acid oxidation
- 750           and ketogenesis in synergy with PPARalpha. *Sci Rep* **6**:39182. DOI: 10.1038/srep39182,
- 751           PMID: PMC5159891
- 752   Nakagawa Y, Satoh A, Yabe S, Furusawa M, Tokushige N, Tezuka H, Mikami M, Iwata W, Shingyouchi
- 753           A, Matsuzaka T, Kiwata S, Fujimoto Y, Shimizu H, Danno H, Yamamoto T, Ishii K, Karasawa T,
- 754           Takeuchi Y, Iwasaki H, Shimada M, Kawakami Y, Urayama O, Sone H, Takekoshi K,
- 755           Kobayashi K, Yatoh S, Takahashi A, Yahagi N, Suzuki H, Yamada N, Shimano H. 2014.
- 756           Hepatic CREB3L3 Controls Whole-Body Energy Homeostasis and Improves Obesity and
- 757           Diabetes. *Endocrinology* **155**:4706-4719. DOI: 10.1210/en.2014-1113
- 758   Nakagawa Y, Shimano H, Yoshikawa T, Ide T, Tamura M, Furusawa M, Yamamoto T, Inoue N,

- 759 Matsuzaka T, Takahashi A, Hasty AH, Suzuki H, Sone H, Toyoshima H, Yahagi N, Yamada N.  
760 2006. TFE3 transcriptionally activates hepatic IRS-2, participates in insulin signaling and  
761 ameliorates diabetes. *Nat Med* **12**:107-113. DOI: nm1334 [pii]  
762 10.1038/nm1334
- 763 Okazaki M, Usui S, Ishigami M, Sakai N, Nakamura T, Matsuzawa Y, Yamashita S. 2005. Identification  
764 of unique lipoprotein subclasses for visceral obesity by component analysis of cholesterol  
765 profile in high-performance liquid chromatography. *Arterioscler Thromb Vasc Biol* **25**:578-584.  
766 DOI: 10.1161/01.ATV.0000155017.60171.88
- 767 Omori Y, Imai J, Watanabe M, Komatsu T, Suzuki Y, Kataoka K, Watanabe S, Tanigami A, Sugano S.  
768 2001. CREB-H: a novel mammalian transcription factor belonging to the CREB/ATF family  
769 and functioning via the box-B element with a liver-specific expression. *Nucleic Acids Res*  
770 **29**:2154-2162, PMID: 55463
- 771 Ostos MA, Conconi M, Vergnes L, Baroukh N, Ribalta J, Girona J, Caillaud JM, Ochoa A, Zakin MM.  
772 2001. Antioxidative and antiatherosclerotic effects of human apolipoprotein A-IV in  
773 apolipoprotein E-deficient mice. *Arterioscler Thromb Vasc Biol* **21**:1023-1028
- 774 Pan X, Shao Y, Wu F, Wang Y, Xiong R, Zheng J, Tian H, Wang B, Wang Y, Zhang Y, Han Z, Qu A, Xu  
775 H, Lu A, Yang T, Li X, Xu A, Du J, Lin Z. 2018. FGF21 Prevents Angiotensin II-Induced  
776 Hypertension and Vascular Dysfunction by Activation of ACE2/Angiotensin-(1-7) Axis in Mice.  
777 *Cell Metab* **27**:1323-1337 e1325. DOI: 10.1016/j.cmet.2018.04.002
- 778 Park JG, Xu X, Cho S, Lee AH. 2016. Loss of Transcription Factor CREBH Accelerates Diet-Induced  
779 Atherosclerosis in Ldlr<sup>-/-</sup> Mice. *Arterioscler Thromb Vasc Biol* **36**:1772-1781. DOI:  
780 10.1161/ATVBAHA.116.307790
- 781 Satoh A, Han SI, Araki M, Nakagawa Y, Ohno H, Mizunoe Y, Kumagai K, Murayama Y, Osaki Y,  
782 Iwasaki H, Sekiya M, Konishi M, Itoh N, Matsuzaka T, Sone H, Shimano H. 2020. CREBH  
783 Improves Diet-Induced Obesity, Insulin Resistance, and Metabolic Disturbances by FGF21-  
784 Dependent and FGF21-Independent Mechanisms. *iScience* **23**:100930. DOI:  
785 10.1016/j.isci.2020.100930, PMID: PMC7063134
- 786 Schlein C, Talukdar S, Heine M, Fischer AW, Krott LM, Nilsson SK, Brenner MB, Heeren J, Scheja L.  
787 2016. FGF21 Lowers Plasma Triglycerides by Accelerating Lipoprotein Catabolism in White  
788 and Brown Adipose Tissues. *Cell Metab* **23**:441-453. DOI: 10.1016/j.cmet.2016.01.006
- 789 Shimano H, Shimomura I, Hammer RE, Herz J, Goldstein JL, Brown MS, Horton JD. 1997. Elevated  
790 levels of SREBP-2 and cholesterol synthesis in livers of mice homozygous for a targeted  
791 disruption of the SREBP-1 gene. *J Clin Invest* **100**:2115-2124. DOI: 10.1172/JCI119746,  
792 PMID: 508404
- 793 Steinmetz A, Barbaras R, Ghalim N, Clavey V, Fruchart JC, Ailhaud G. 1990. Human apolipoprotein  
794 A-IV binds to apolipoprotein A-I/A-II receptor sites and promotes cholesterol efflux from  
795 adipose cells. *J Biol Chem* **265**:7859-7863
- 796 Steinmetz A, Utermann G. 1985. Activation of lecithin: cholesterol acyltransferase by human



797           apolipoprotein A-IV. *J Biol Chem* **260**:2258-2264

798   Uchida A, Whitsitt MC, Eustaquio T, Slipchenko MN, Leary JF, Cheng JX, Buhman KK. 2012.

799           Reduced triglyceride secretion in response to an acute dietary fat challenge in obese

800           compared to lean mice. *Front Physiol* **3**:26. DOI: 10.3389/fphys.2012.00026, PMID: 3285805

801   Wang H, Zhao M, Sud N, Christian P, Shen J, Song Y, Pashaj A, Zhang K, Carr T, Su Q. 2016.

802           Glucagon regulates hepatic lipid metabolism via cAMP and Insig-2 signaling: implication for

803           the pathogenesis of hypertriglyceridemia and hepatic steatosis. *Sci Rep* **6**:32246. DOI:

804           10.1038/srep32246, PMID: PMC5007496

805   Wu X, Qi YF, Chang JR, Lu WW, Zhang JS, Wang SP, Cheng SJ, Zhang M, Fan Q, Lv Y, Zhu H, Xin

806           MK, Lv Y, Liu JH. 2014. Possible role of fibroblast growth factor 21 on atherosclerosis via

807           amelioration of endoplasmic reticulum stress-mediated apoptosis in apoE mice. *Heart*

808           *Vessels*. DOI: 10.1007/s00380-014-0557-9

809   Xu X, Park JG, So JS, Hur KY, Lee AH. 2014. Transcriptional regulation of apolipoprotein A-IV by the

810           transcription factor CREBH. *J Lipid Res* **55**:850-859. DOI: 10.1194/jlr.M045104, PMID:

811           PMC3995463

812   Yakar S, Liu JL, Stannard B, Butler A, Accili D, Sauer B, LeRoith D. 1999. Normal growth and

813           development in the absence of hepatic insulin-like growth factor I. *Proc Natl Acad Sci U S A*

814           **96**:7324-7329. DOI: 10.1073/pnas.96.13.7324, PMID: PMC22084

815   Yoshikawa T, Ide T, Shimano H, Yahagi N, Amemiya-Kudo M, Matsuzaka T, Yatoh S, Kitamine T,

816           Okazaki H, Tamura Y, Sekiya M, Takahashi A, Hasty AH, Sato R, Sone H, Osuga J, Ishibashi

817           S, Yamada N. 2003. Cross-talk between peroxisome proliferator-activated receptor (PPAR)

818           alpha and liver X receptor (LXR) in nutritional regulation of fatty acid metabolism. I. PPARs

819           suppress sterol regulatory element binding protein-1c promoter through inhibition of LXR

820           signaling. *Mol Endocrinol* **17**:1240-1254. DOI: 10.1210/me.2002-0190

821   Zhang K, Shen X, Wu J, Sakaki K, Saunders T, Rutkowski DT, Back SH, Kaufman RJ. 2006.

822           Endoplasmic reticulum stress activates cleavage of CREBH to induce a systemic

823           inflammatory response. *Cell* **124**:587-599. DOI: S0092-8674(06)00004-3 [pii]

824   10.1016/j.cell.2005.11.040

825

826

827 **Figure Legends**

828 **Figure 1. *Ldlr*<sup>-/-</sup> *Creb3l3*<sup>-/-</sup> mice promote atherosclerosis feeding a western diet (WD)**  
829 **for 5 weeks.**

830 Ten ~ eleven-week-old female *Ldlr*<sup>-/-</sup> and *Ldlr*<sup>-/-</sup>*Creb3l3*<sup>-/-</sup> mice were fed a WD for 5 weeks;  
831 samples were collected in a fed state. **(A)** Representative images of entire Sudan IV-stained  
832 aortas from *Ldlr*<sup>-/-</sup> ( $n = 14$ ) and *Ldlr*<sup>-/-</sup>*Creb3l3*<sup>-/-</sup> ( $n = 17$ ) mice. The surface area occupied by  
833 lesions was quantified.  $**p < 0.01$  vs. *Ldlr*<sup>-/-</sup> mice. **(B)** Representative aortic root sections from  
834 *Ldlr*<sup>-/-</sup> ( $n = 10$ ) and *Ldlr*<sup>-/-</sup>*Creb3l3*<sup>-/-</sup> ( $n = 16$ ) mice. Cross-sections were stained with Oil Red  
835 O and hematoxylin. Aortic root lesion areas were quantified.  $**p < 0.01$  vs. *Ldlr*<sup>-/-</sup> mice. **(C)**  
836 Plasma TG and TC levels,  $n = 7$  each; HPLC analysis of plasma lipoprotein profiles specific  
837 for plasma TG and cholesterol. ApoB100 and ApoB48 in very low-density lipoprotein (VLDL)  
838 fractions and its quantification.  $n = 7$  each;  $**p < 0.01$  vs. *Ldlr*<sup>-/-</sup> mice. Plasma ApoA4 levels.  
839 **(D)** Plasma FFA ( $n = 7$  each) and FGF21 levels ( $n = 5-6$  per group);  $*p < 0.05$  vs. *Ldlr*<sup>-/-</sup> mice.  
840 **(E)** Plasma aspartate and alanine aminotransferase (AST and ALT) levels.  $n = 9-10$  per group;  
841  $*p < 0.05$  and  $**p < 0.01$  vs. *Ldlr*<sup>-/-</sup> mice. **(F)** Histology of liver sections and liver TG and TC  
842 levels,  $n = 7$  per group;  $*p < 0.05$  and  $**p < 0.01$  vs. *Ldlr*<sup>-/-</sup> mice. **(G)** Hematoxylin and eosin  
843 staining, Oil Red O staining, and periodic acid-Schiff staining of small intestines from these  
844 mice. **(H)** Intestinal TG and TC levels of these mice.  $n = 6-8$  per group **(I)** The quantification  
845 of campesterol and  $\beta$ -sitosterol levels of female these mice.  $n = 7-8$  per group;  $**p < 0.01$  vs.  
846 *Ldlr*<sup>-/-</sup> mice.

847

848 **Figure 2. *Ldlr*<sup>-/-</sup> *Creb3l3*<sup>-/-</sup> mice promote atherosclerosis feeding a WD for 3 months.**

849 Ten ~ eleven-week-old female *Ldlr*<sup>-/-</sup> and *Ldlr*<sup>-/-</sup>*Creb3l3*<sup>-/-</sup> mice were fed a WD for 3 months;  
850 samples were collected in a fed state. **(A)** Representative images of entire Sudan IV-stained  
851 aortas from *Ldlr*<sup>-/-</sup> ( $n = 10$ ) and *Ldlr*<sup>-/-</sup>*Creb3l3*<sup>-/-</sup> ( $n = 11$ ) mice. The surface area occupied by

852 lesions was quantified. **(B)** Representative aortic root sections from *Ldlr*<sup>-/-</sup> (*n* = 9) and  
853 *Ldlr*<sup>-/-</sup>*Creb3l3*<sup>-/-</sup> (*n* = 10) mice. Cross-sections were stained with Oil Red O and hematoxylin.  
854 Aortic root lesion areas were quantified. \*\**p* < 0.01 vs. *Ldlr*<sup>-/-</sup> mice. **(C)** Plasma TG (*n* = 6–  
855 7) and TC (*n* = 11 each) levels. HPLC analysis of plasma lipoprotein profiles specific for  
856 plasma TG and cholesterol. \*\**p* < 0.01 vs. *Ldlr*<sup>-/-</sup> mice. **(D)** Plasma FFA and FGF21 levels. *n*  
857 = 11 each; \**p* < 0.05 and \*\**p* < 0.01 vs. *Ldlr*<sup>-/-</sup> mice.

858

859 **Figure 3. Tissue-specific *Creb3l3* deletion in *Ldlr*<sup>-/-</sup> mice fed a WD for 3 months**  
860 **exacerbate atherosclerosis development.**

861 Ten ~ eleven-week-old female *Ldlr*<sup>-/-</sup>flox (flox), *Ldlr*<sup>-/-</sup>liver-specific *Creb3l3* knockout (LKO),  
862 *Ldlr*<sup>-/-</sup>intestine-specific *Creb3l3* knockout (IKO), and *Ldlr*<sup>-/-</sup>liver- and intestine-specific *Creb3l3*  
863 knockout (DKO) mice were fed a WD for 3 months; samples were collected in a fed state. **(A)**  
864 Representative images of entire Sudan IV-stained aortas from flox (*n* = 10), LKO (*n* = 8), IKO,  
865 (*n* = 13) and DKO (*n* = 10) mice. The surface area occupied by the lesions was quantified. \**p*  
866 < 0.05 and \*\**p* < 0.01 among genotypes. **(B)** Representative aortic root sections from flox (*n*  
867 = 9), LKO (*n* = 8), IKO (*n* = 11), and DKO (*n* = 10) mice. Cross-sections were stained with Oil  
868 Red O and hematoxylin. Aortic root lesion areas were quantified. \**p* < 0.05 and \*\**p* < 0.01  
869 among genotypes.

870

871 **Figure 4. *Ldlr*<sup>-/-</sup>TgCREB3L3 mice suppress atherosclerosis development when fed a**  
872 **WD for 3 months.**

873 Ten ~ eleven-week-old male *Ldlr*<sup>-/-</sup>, *Ldlr*<sup>-/-</sup>TgCREB3L3, *Ldlr*<sup>-/-</sup>*Fgf21*<sup>-/-</sup>, and  
874 *Ldlr*<sup>-/-</sup>*Fgf21*<sup>-/-</sup>TgCREB3L3 mice were fed a WD for 3 months. Samples were collected in a fed  
875 state. **(A)** Representative images of entire Sudan IV-stained aortas from *Ldlr*<sup>-/-</sup> (*n* = 22),  
876 *Ldlr*<sup>-/-</sup>TgCREB3L3 (*n* = 8), *Ldlr*<sup>-/-</sup>*Fgf21*<sup>-/-</sup> (*n* = 14), and *Ldlr*<sup>-/-</sup>*Fgf21*<sup>-/-</sup>TgCREB3L3 (*n* = 14)

877 mice. The surface area occupied by lesions was quantified. \* $p < 0.05$  and \*\* $p < 0.01$  among  
878 genotypes. (B) Representative aortic root sections from *Ldlr*<sup>-/-</sup> ( $n = 18$ ), *Ldlr*<sup>-/-</sup>TgCREB3L3 ( $n$   
879 = 11), *Ldlr*<sup>-/-</sup>*Fgf21*<sup>-/-</sup> ( $n = 11$ ), and *Ldlr*<sup>-/-</sup>*Fgf21*<sup>-/-</sup>TgCREB3L3 ( $n = 12$ ) mice. Cross-sections  
880 were stained with Oil Red O and hematoxylin. Aortic root lesion areas were quantified. \*\* $p <$   
881 0.01 among genotypes. (C) Plasma TG, TC, FFA, and FGF21 levels.  $n = 7-21$ ; \* $p < 0.05$  and  
882 \*\* $p < 0.01$  among genotypes. (D) Plasma ApoA4 levels were detected by western blotting.

883

884 **Figure 5. Gene expression in *Ldlr*<sup>-/-</sup> mice, *Ldlr*<sup>-/-</sup>*Creb3l3*<sup>-/-</sup> mice, and *Ldlr*<sup>-/-</sup> TgCREB3L3**  
885 **mice.**

886 Gene expression in the livers of 8-week-old female *Ldlr*<sup>-/-</sup> and *Ldlr*<sup>-/-</sup>*Creb3l3*<sup>-/-</sup> mice ( $n = 11$   
887 per group) (A) and male *Ldlr*<sup>-/-</sup> and *Ldlr*<sup>-/-</sup> TgCREB3L3 mice ( $n = 7$  per group) (B) in a fed  
888 state with normal chow. \* $p < 0.05$  and \*\* $p < 0.01$  vs. *Ldlr*<sup>-/-</sup> mice. (C) Gene expression in the  
889 intestines of 8-week-old male *Ldlr*<sup>-/-</sup> and *Ldlr*<sup>-/-</sup> TgCREB3L3 mice in a fed state with normal  
890 chow.  $n = 7$  per group; \* $p < 0.05$  and \*\* $p < 0.01$  vs. *Ldlr*<sup>-/-</sup> mice.

891

892 **Figure 6. Premature CREB3L3 suppresses the cleavage of SREBPs.**

893 (A) Immunoblot analysis of SREBPs in hepatic nuclear extracts and total cell lysates from 8-  
894 week-old female *Ldlr*<sup>-/-</sup> and *Ldlr*<sup>-/-</sup>*Creb3l3*<sup>-/-</sup> mice. Each lane was a pooled sample from three  
895 mouse livers. (B) Immunoblot analysis of SREBPs in hepatic nuclear extracts and total cell  
896 lysates (Each lane was a pooled sample from three mouse livers. The values were indicated  
897 as fold changes of band intensity vs GFP infection.), hepatic expression of *Srebf*s, and plasma  
898 TG and TC levels in 10-week-old female *Ldlr*<sup>-/-</sup> and *Ldlr*<sup>-/-</sup>*Creb3l3*<sup>-/-</sup> mice infected with  
899 adenoviruses encoding green fluorescent protein and the low and high dose of full-length  
900 CREB3L3 (pCREB3L3) after feeding with normal chow for 6 days.  $n = 4-8$ ; \* $p < 0.05$  and \*\* $p$   
901 < 0.01 vs. *Ldlr*<sup>-/-</sup> mice. (C) Hepatic SREBP cleavage modulator gene expression in 8-week-

902 old female *Ldlr*<sup>-/-</sup> and *Ldlr*<sup>-/-</sup>*Creb3l3*<sup>-/-</sup>, and 8-week-old male *Ldlr*<sup>-/-</sup> and *Ldlr*<sup>-/-</sup> TgCREB3L3  
903 mice in a fed state with normal chow. *n* = 4–6; \**p* < 0.05 and \*\**p* < 0.01 vs. *Ldlr*<sup>-/-</sup> mice. **(D)**  
904 pCREB3L3 suppresses SREBP transcriptional activity. pCREB3L3 or active form of CREB3L3  
905 (mCREB3L3), and pSREBP expression vectors were co-transfected with an SRE-luc vector  
906 into HEK293 cells. Luciferase activity was determined after 48 h. *n* = 4–8; \**p* < 0.05 and \*\**p* <  
907 0.01 vs. Control. **(E)** Physical association between CREB3L3 and SREBPs. Vectors were co-  
908 transfected into HEK293 cells; after 24 h, cell lysates were collected and immunoprecipitated  
909 with an anti-V5 antibody. Immunoprecipitants were detected with the indicated antibodies. **(F**  
910 **– H)** The localization of SREBP-1c and CREB3L3 in the cellular component. mCherry-  
911 pSREBP-1c (mCherry-BP-1c) and SCAP, with/without GFP-pCREB3L3 (GFP-CREB3L3)  
912 were co-transfected into HEK293 cells. DAPI for the nucleus **(F)**, Calnexin for ER **(G)**, and  
913 GM130 for Golgi apparatus **(H)** were immunostained. **(I)** CREB3L3 inhibits SREBPs-S1P  
914 interaction. Using DuoLink PLA assay, the red dots showed the pSREBP-1c-S1P association.  
915 \**p* < 0.05. **(J)** Immunoblot analysis of CREB3L3 in hepatic nuclear extracts and total cell  
916 lysates from 16-week-old male WT and *Srebfl1*<sup>-/-</sup> mice. **(K)** Schematic representation of  
917 atherosclerosis development via a competitive transport interaction of SREBPs and CREB3L3.  
918  
919

# Figure 1

## 5 weeks Female

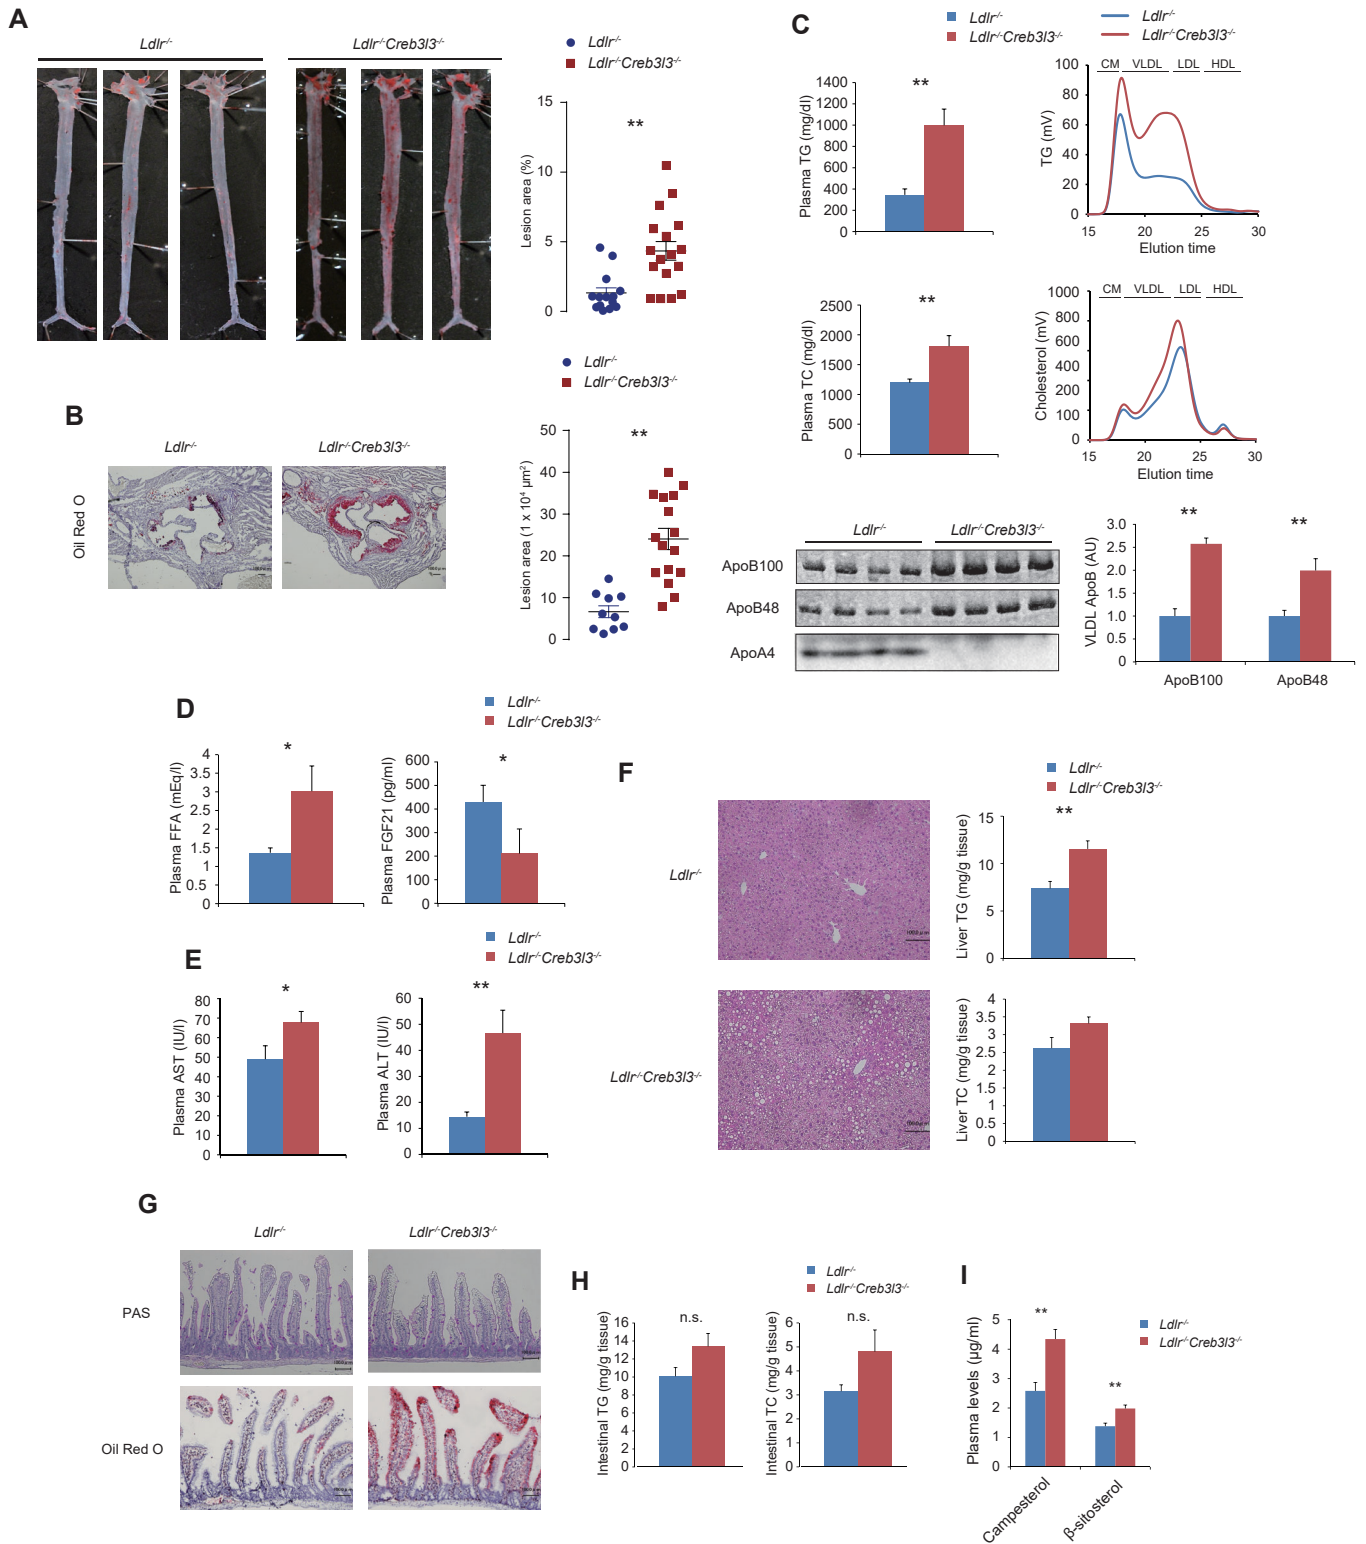

## Figure 2

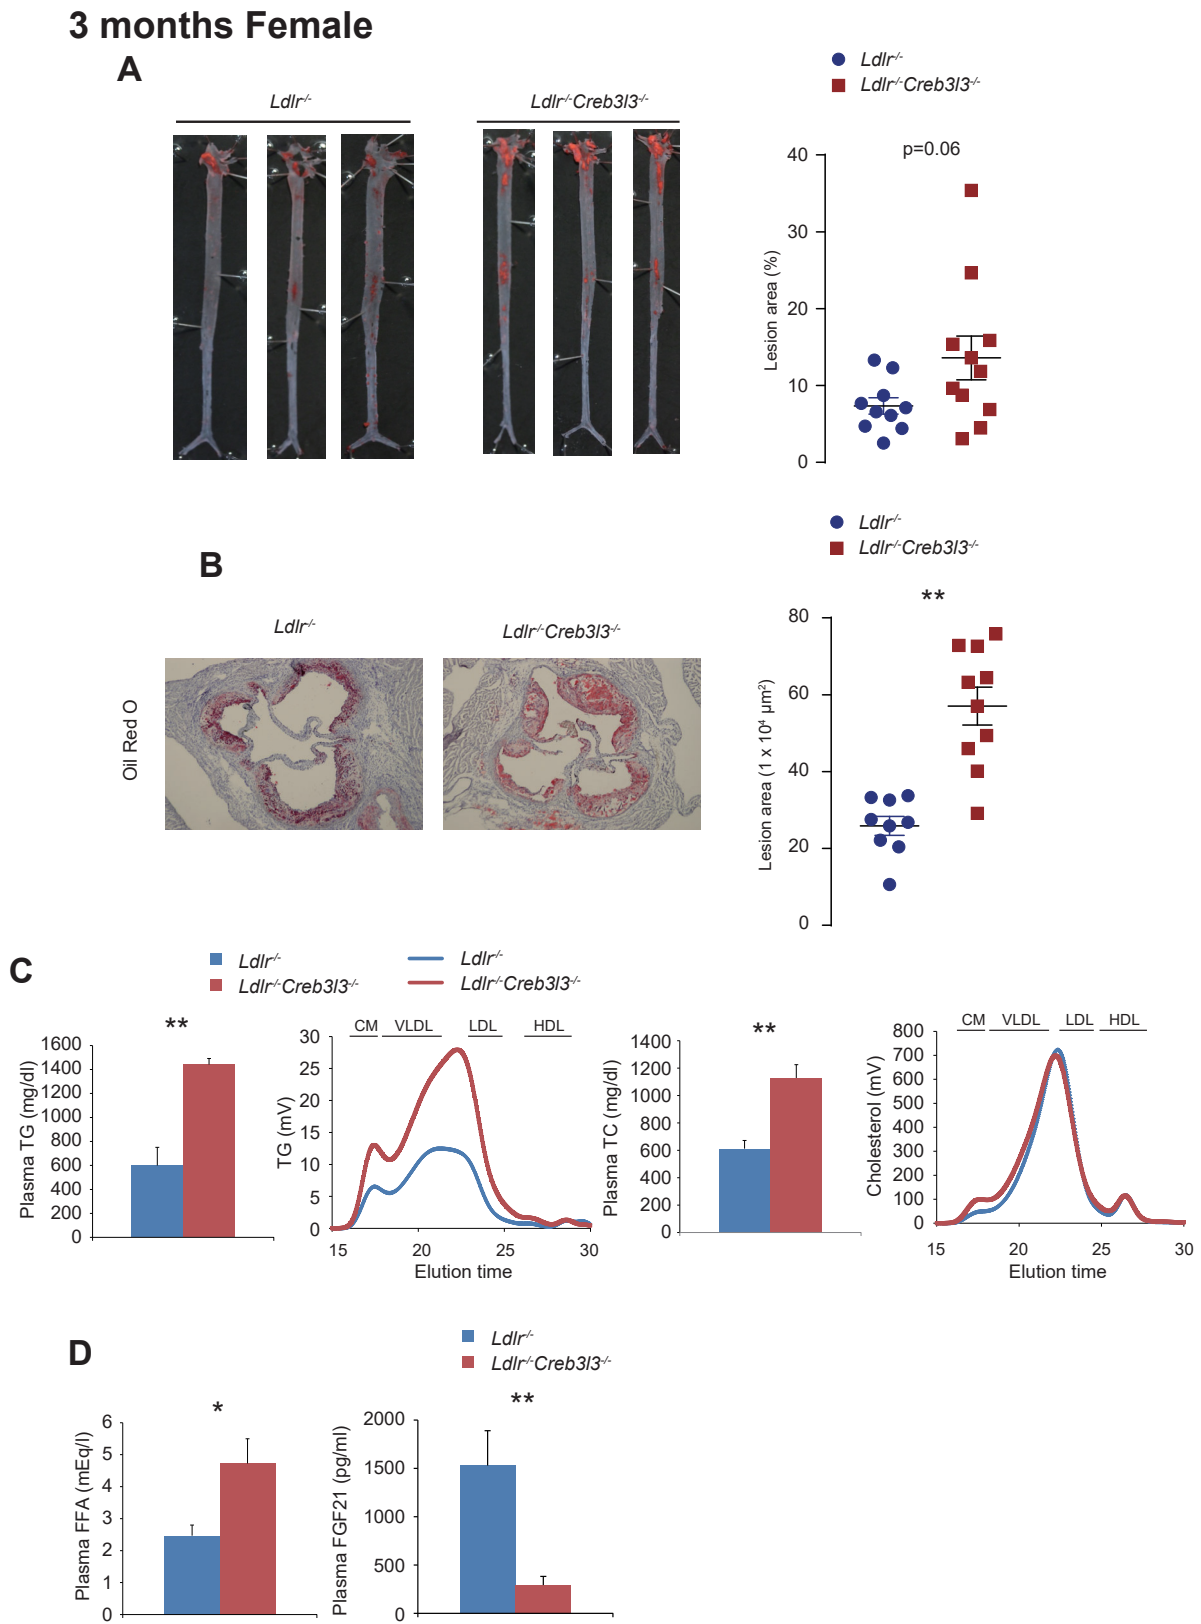

## Figure 3

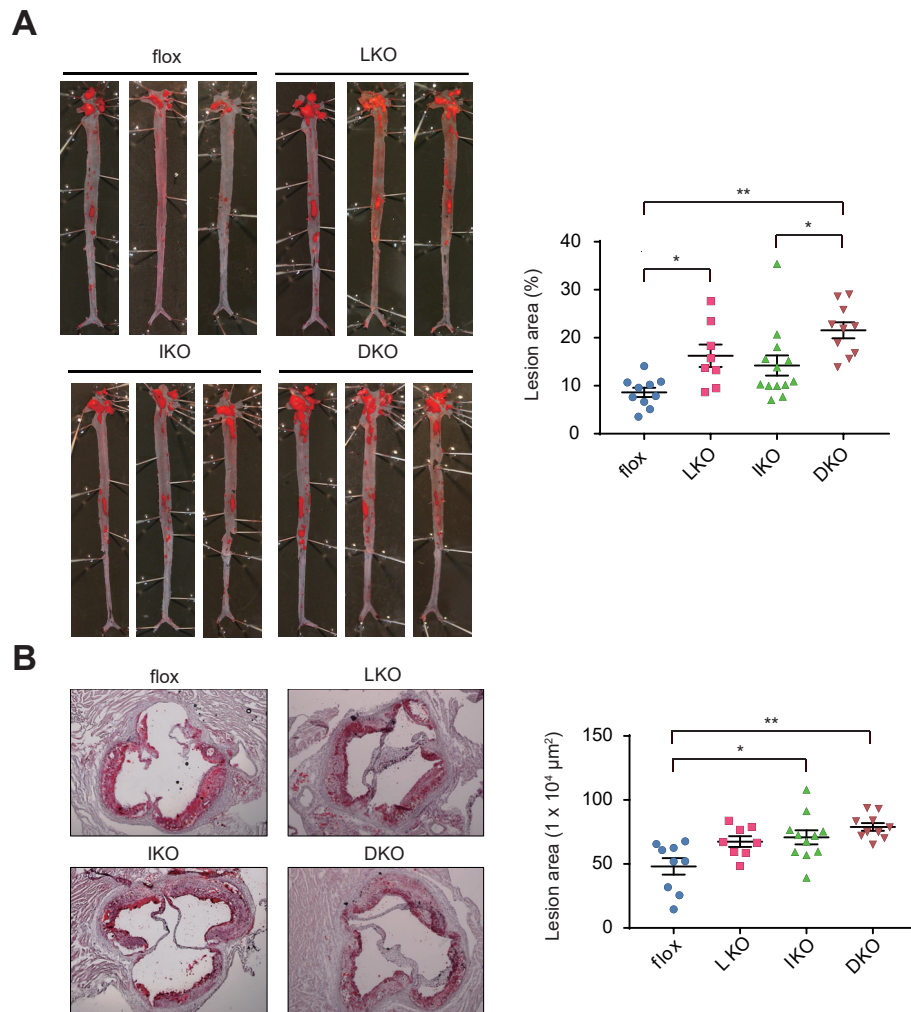



## Figure 4

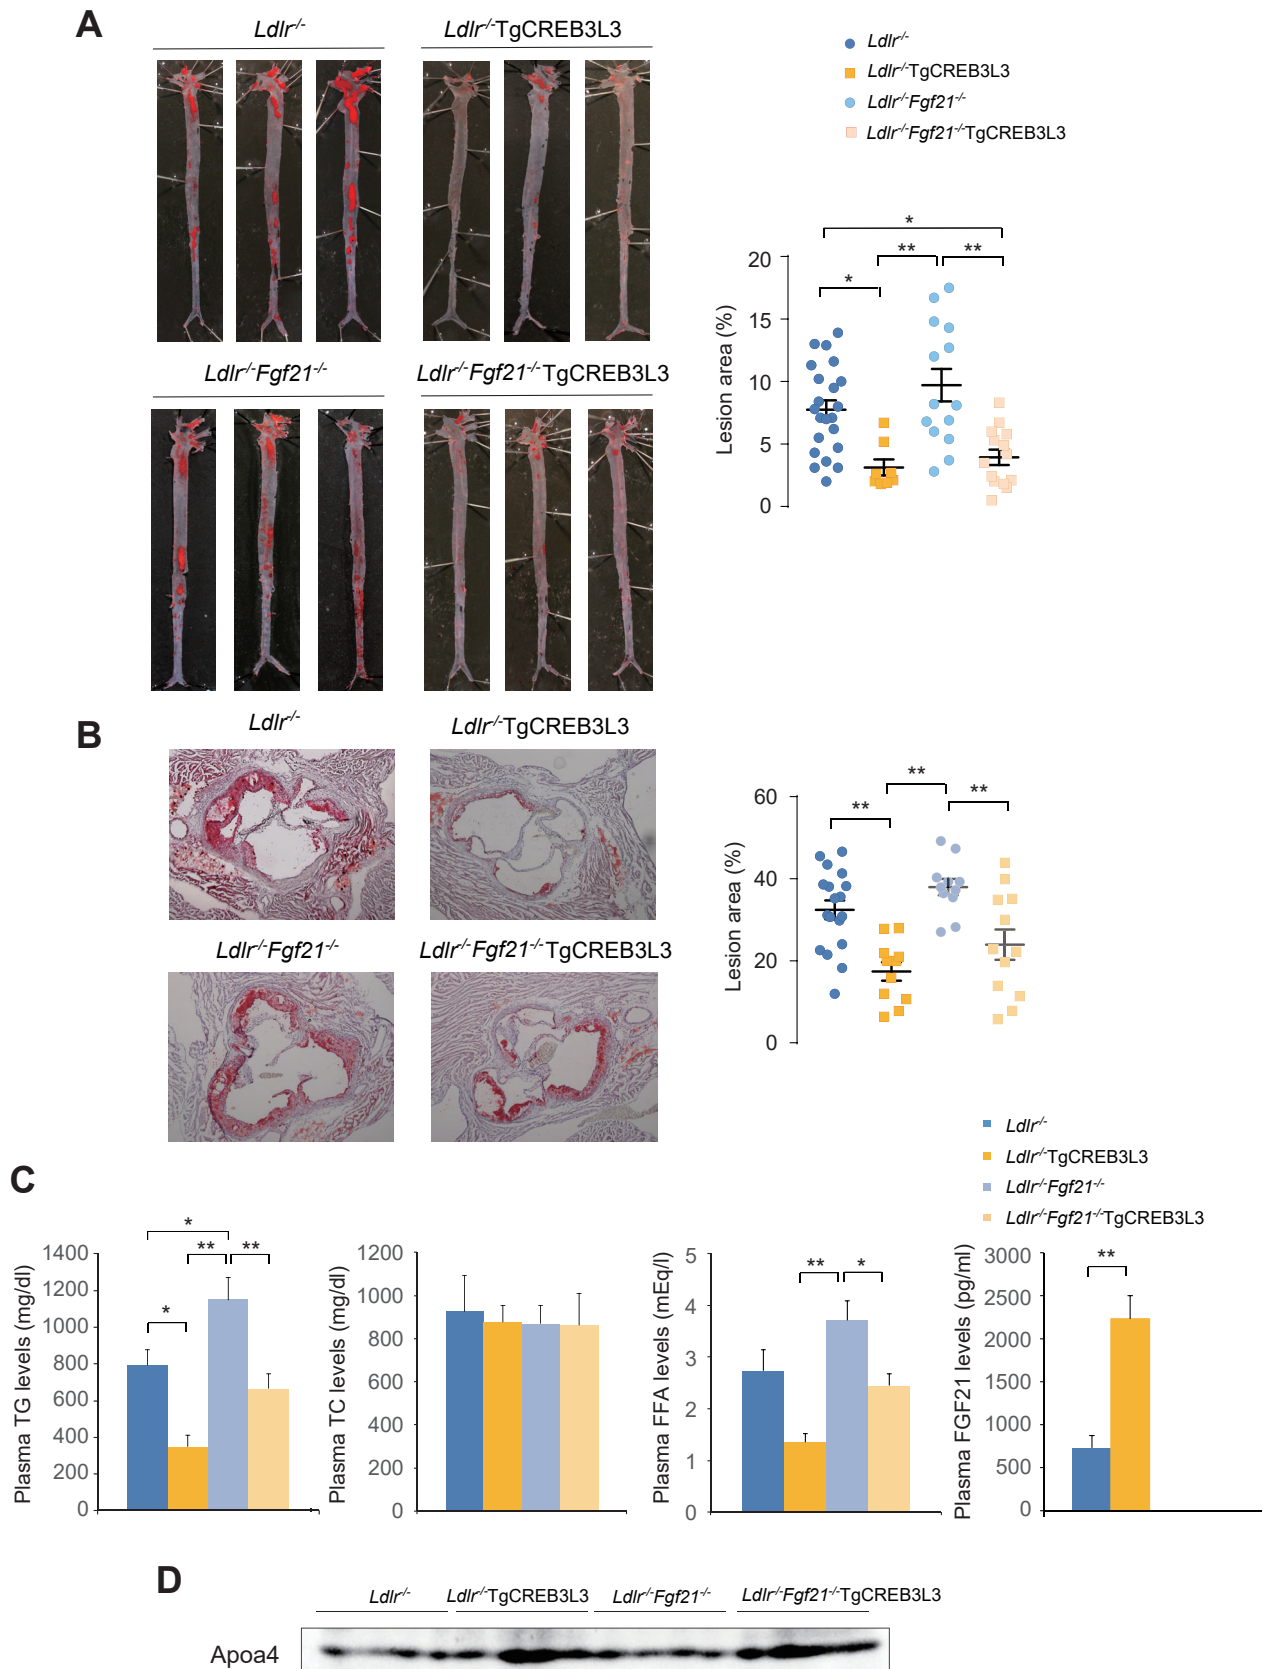

## Figure 5

### A Liver

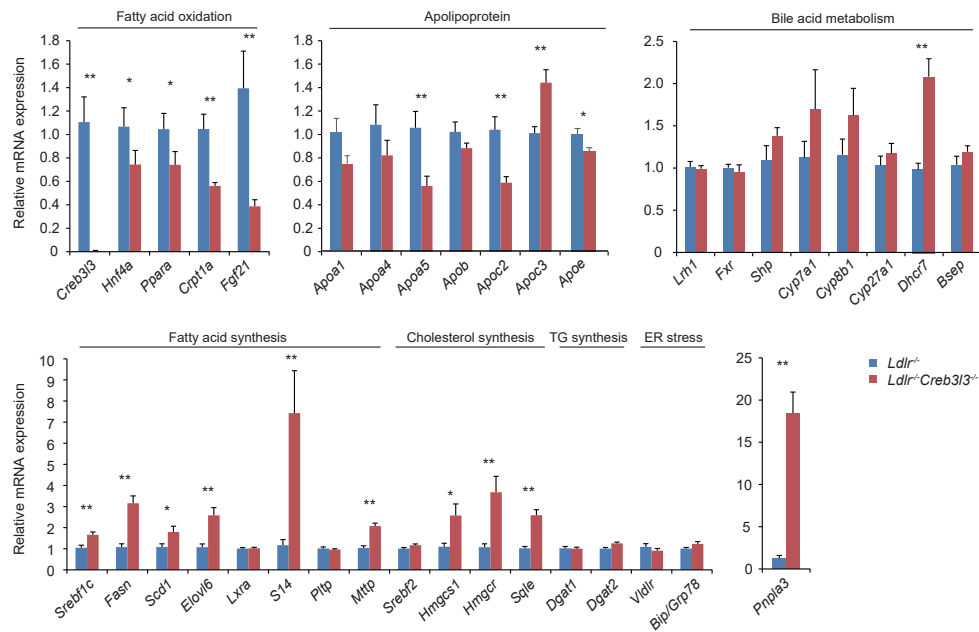

### B Liver

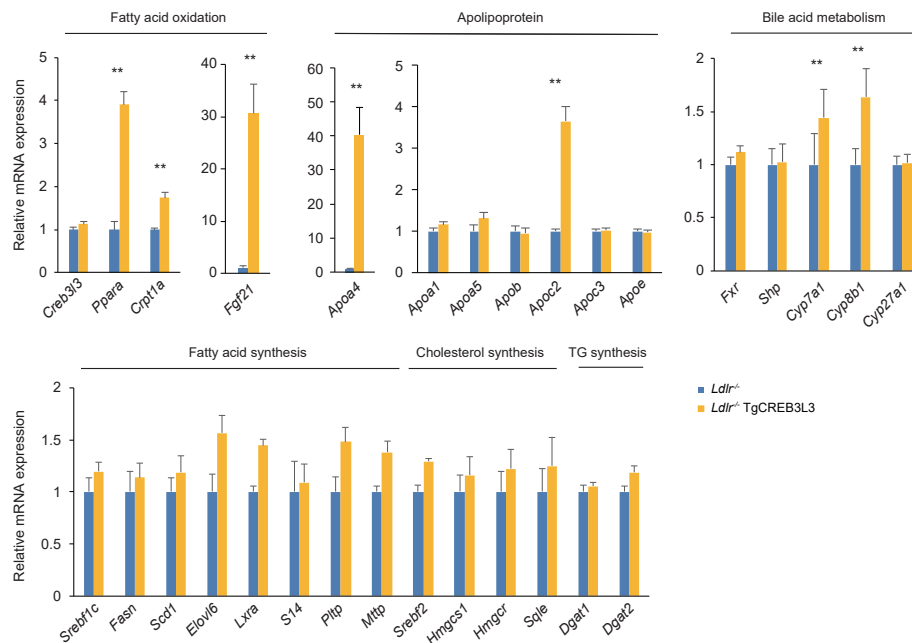

### C Intestine

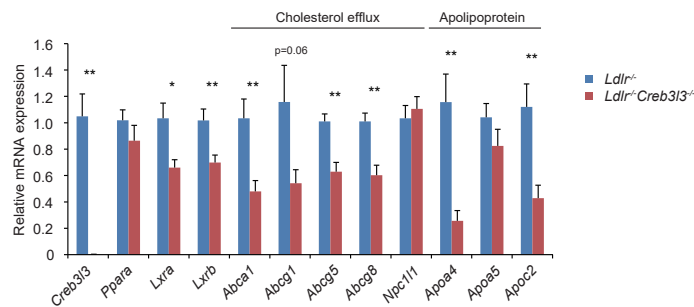

## Figure 6

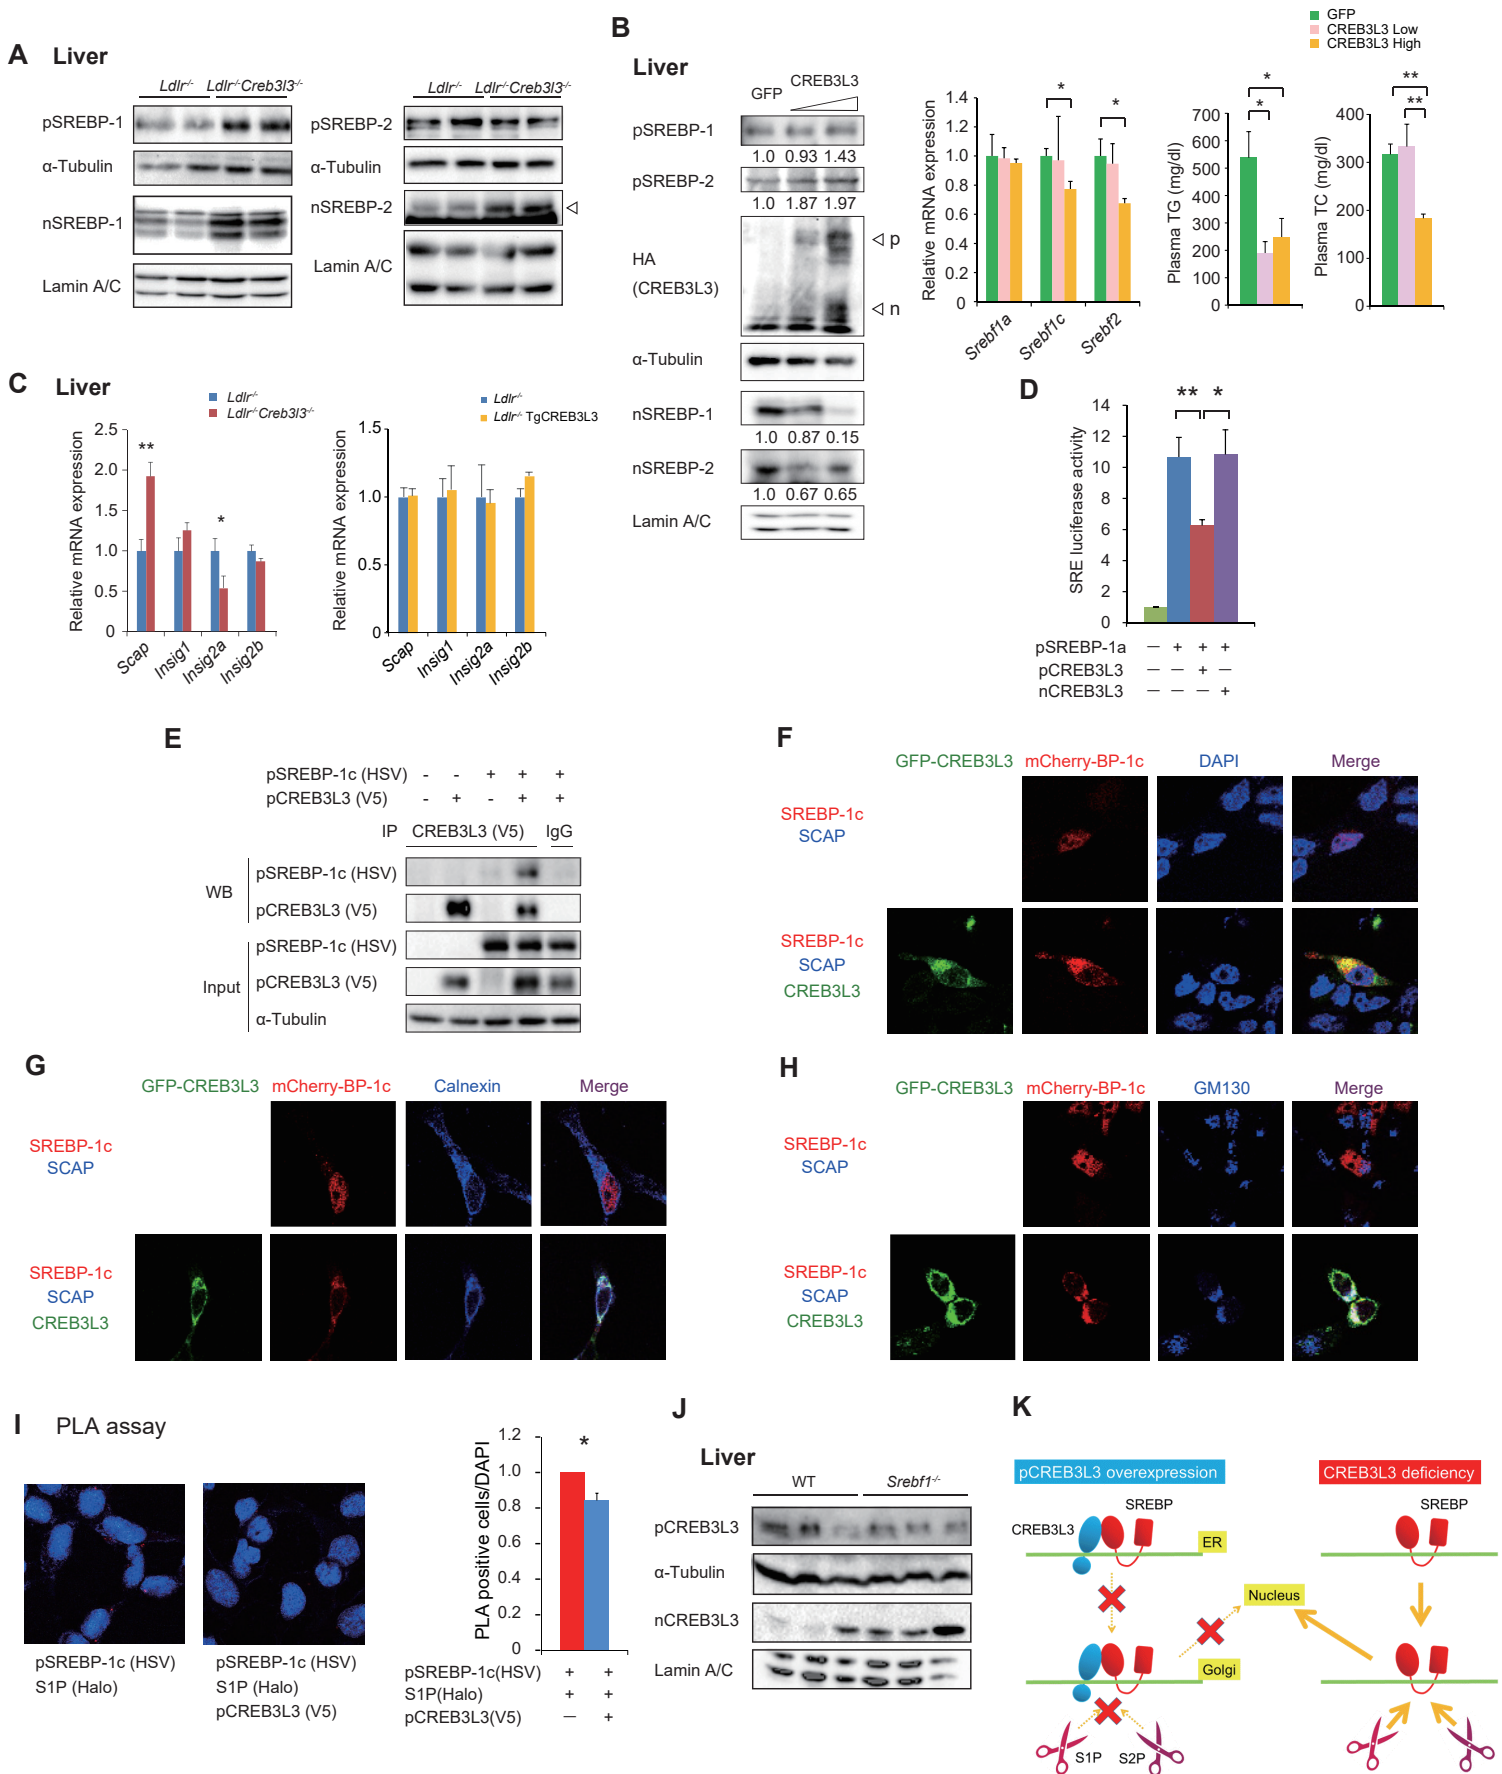

920 **Supplement figure list**

921

922 **Figure 1—figure supplement 1. Male *Ldlr*<sup>-/-</sup> *Creb3l3*<sup>-/-</sup> mice promote atherosclerosis**  
923 **feeding a WD for 5 weeks.**

924 **Figure 1—figure supplement 2. *Ldlr*<sup>-/-</sup> *Creb3l3*<sup>-/-</sup> mice promote atherosclerosis even**  
925 **feeding with normal chow.**

926 **Figure 1—figure supplement 3. *Ldlr*<sup>-/-</sup> *Creb3l3*<sup>-/-</sup> mice increase intestinal TG absorption.**

927 **Figure 3—figure supplement 1. Plasma lipoprotein profiles in female tissue-specific**  
928 ***Creb3l3* deletion in *Ldlr*<sup>-/-</sup> mice.**

929 **Figure 4—figure supplement 1. Ectopic active form of CREB3L3 protein in liver and**  
930 **intestine of *Ldlr*<sup>-/-</sup> TgCREB3L3 mice.**

931 **Figure 5—figure supplement 1. Very low-density lipoprotein secretion and TG**  
932 **clearance in *Ldlr*<sup>-/-</sup> *Creb3l3*<sup>-/-</sup> and *Ldlr*<sup>-/-</sup> TgCREB3L3 mice.**

933

934

935

936 **Supplement figure legend**

937 **Figure 1—figure supplement 1. Male *Ldlr*<sup>-/-</sup> *Creb3l3*<sup>-/-</sup> mice promote atherosclerosis**  
938 **feeding a WD for 5 weeks.**

939 Ten ~ eleven-week-old male *Ldlr*<sup>-/-</sup> and *Ldlr*<sup>-/-</sup>*Creb3l3*<sup>-/-</sup> mice were fed a WD for 5 weeks;  
940 samples were collected in a fed state. **(A)** Representative images of entire Sudan IV-stained  
941 aortas from *Ldlr*<sup>-/-</sup> ( $n = 11$ ) and *Ldlr*<sup>-/-</sup>*Creb3l3*<sup>-/-</sup> ( $n = 11$ ) mice. The surface area occupied by  
942 lesions was quantified.  $**p < 0.01$  vs. *Ldlr*<sup>-/-</sup> mice. **(B)** Representative aortic root sections from  
943 *Ldlr*<sup>-/-</sup> ( $n = 11$ ) and *Ldlr*<sup>-/-</sup>*Creb3l3*<sup>-/-</sup> ( $n = 11$ ) mice. Cross-sections were stained with Oil Red  
944 O and hematoxylin. Aortic root lesion areas were quantified.  $*p < 0.05$  vs. *Ldlr*<sup>-/-</sup> mice. **(C)**  
945 Plasma TG and TC levels,  $n = 11$  each; HPLC analysis of plasma lipoprotein profiles specific  
946 for plasma TG and cholesterol. ApoB100 and ApoB48 were isolated from VLDL fractions via  
947 ultracentrifugation, subjected to SDS-PAGE, stained with CBB, and quantified.  $n = 6-7$  per  
948 group;  $*p < 0.05$  and  $**p < 0.01$  vs. *Ldlr*<sup>-/-</sup> mice. Plasma ApoA4 levels were determined by WB.  
949 **(D)** Plasma FFA and FGF21 levels.  $n = 11$  each;  $*p < 0.05$  vs. *Ldlr*<sup>-/-</sup> mice. **(E)** Histology of  
950 liver sections, and liver TG and TC levels,  $n = 12-15$  per group;  $*p < 0.05$  vs. *Ldlr*<sup>-/-</sup> mice.

951

952 **Figure 1—figure supplement 2. *Ldlr*<sup>-/-</sup> *Creb3l3*<sup>-/-</sup> mice promote atherosclerosis even**  
953 **feeding with normal chow.**

954 Sixteen-week-old female **(A-C)** and male **(D-F)** *Ldlr*<sup>-/-</sup> and *Ldlr*<sup>-/-</sup>*Creb3l3*<sup>-/-</sup> mice were fed a  
955 normal diet. Samples were collected in a fed state. **(A)** Representative aortic root sections  
956 from female *Ldlr*<sup>-/-</sup> ( $n = 10$ ) and *Ldlr*<sup>-/-</sup>*Creb3l3*<sup>-/-</sup> ( $n = 11$ ) mice. Cross-sections were stained  
957 with Oil Red O and hematoxylin. Aortic lesion areas were quantified.  $**p < 0.01$  vs. *Ldlr*<sup>-/-</sup> mice.  
958 **(B)** Representative images of entire Sudan IV-stained aortas from *Ldlr*<sup>-/-</sup> ( $n = 7$ ) and  
959 *Ldlr*<sup>-/-</sup>*Creb3l3*<sup>-/-</sup> ( $n = 6$ ) mice. The surface area occupied by lesions was quantified.  $**p < 0.01$   
960 vs. *Ldlr*<sup>-/-</sup> mice. **(C)** Plasma TG, TC, and FFA levels of female *Ldlr*<sup>-/-</sup> ( $n = 6$ ) and

961 *Ldlr*<sup>-/-</sup>*Creb3l3*<sup>-/-</sup> (*n* = 7) mice. \*\**p* < 0.01 vs. *Ldlr*<sup>-/-</sup> mice. (D) Representative aortic root sections  
962 from male *Ldlr*<sup>-/-</sup> (*n* = 15) and *Ldlr*<sup>-/-</sup>*Creb3l3*<sup>-/-</sup> (*n* = 17) mice. Cross-sections were stained with  
963 Oil Red O and hematoxylin. Aortic lesion areas were quantified. \*\**p* < 0.01 vs. *Ldlr*<sup>-/-</sup> mice. (E)  
964 Representative images of entire Sudan IV-stained aortas from male *Ldlr*<sup>-/-</sup> (*n* = 7) and  
965 *Ldlr*<sup>-/-</sup>*Creb3l3*<sup>-/-</sup> (*n* = 10) mice. The surface area occupied by lesions was quantified. \**p* < 0.05  
966 vs. *Ldlr*<sup>-/-</sup> mice. (F) Plasma TG, TC, and FFA levels of male *Ldlr*<sup>-/-</sup> (*n* = 10) and *Ldlr*<sup>-/-</sup>*Creb3l3*<sup>-/-</sup>  
967 (*n* = 14) mice. \**p* < 0.05 and \*\**p* < 0.01 vs. *Ldlr*<sup>-/-</sup> mice.

968

969 **Figure 1—figure supplement 3. *Ldlr*<sup>-/-</sup> *Creb3l3*<sup>-/-</sup> mice increase intestinal TG absorption.**

970 Eight-week-old female *Ldlr*<sup>-/-</sup> and *Ldlr*<sup>-/-</sup>*Creb3l3*<sup>-/-</sup> mice were fasted for 3 h and intravenously  
971 injected with Triton WR-1339. After 2 h of injection, mice were orally administered 100 μl of  
972 olive oil. Plasma was collected at 0, 1, 2, and 3 h after administration. *n* = 7 each, \* *p* < 0.05,  
973 \*\* *p* < 0.01, vs *Ldlr*<sup>-/-</sup> mice.

974

975 **Figure 3—figure supplement 1. Plasma lipoprotein profiles in female tissue-specific**  
976 ***Creb3l3* deletion in *Ldlr*<sup>-/-</sup> mice.**

977 Samples were collected from 8-week-old female *Ldlr*<sup>-/-</sup> flox, *Ldlr*<sup>-/-</sup> LKO, *Ldlr*<sup>-/-</sup> IKO, and *Ldlr*<sup>-/-</sup>  
978 DKO mice in a fed state. (A, B) Plasma TG (A), TC (B) levels. *n* = 17–29 per group; \**p* < 0.05  
979 and \*\**p* < 0.01 among genotypes. HPLC analysis of plasma lipoprotein profiles of TG and  
980 cholesterol. (C) Plasma NEFA (*n* = 18–25 per group) and FGF21 (*n* = 16–17 per group) levels.  
981 \*\**p* < 0.01 among genotypes.

982

983 **Figure 4—figure supplement 1. Ectopic active form of CREB3L3 protein in liver and**  
984 **intestine of *Ldlr*<sup>-/-</sup>TgCREB3L3 mice.**

985 The ectopic active form of CREB3L3 protein levels in the liver and small intestine of 8-week-

986 old male *Ldlr*<sup>-/-</sup> and *Ldlr*<sup>-/-</sup>TgCREB3L3 mice were determined by western blotting.

987

988 **Figure 5—figure supplement 1. Very low-density lipoprotein secretion and TG**

989 **clearance in *Ldlr*<sup>-/-</sup>*Creb3l3*<sup>-/-</sup> and *Ldlr*<sup>-/-</sup>TgCREB3L3 mice.**

990 **(A, D):** TG production rates (Tyloxapol test) in 8-week-old female *Ldlr*<sup>-/-</sup> (*n* = 6) and

991 *Ldlr*<sup>-/-</sup>*Creb3l3*<sup>-/-</sup> (*n* = 11) mice **(A)** and male *Ldlr*<sup>-/-</sup> (*n* = 6) and *Ldlr*<sup>-/-</sup>TgCREB3L3 (*n* = 6)

992 mice **(D)**. Mice were starved for 24 h and intravenously injected with Triton WR-1339.

993 Plasma was collected at 0, 30, 60, and 120 min post-injection. \*\**p* < 0.01 vs. *Ldlr*<sup>-/-</sup> mice. **(B,**

994 **E)** Postprandial TG responses (Olive oil test) in 9-week-old female *Ldlr*<sup>-/-</sup> (*n* = 7–8) and

995 *Ldlr*<sup>-/-</sup>*Creb3l3*<sup>-/-</sup> (*n* = 8) mice **(B)** and male *Ldlr*<sup>-/-</sup> (*n* = 7) and *Ldlr*<sup>-/-</sup>TgCREB3L3 (*n* = 5) mice

996 **(E)**. Mice were starved for 16 h, followed by oral administration of 200 μl of olive oil. Plasma

997 was collected at 0, 3, 6, and 9 h post-administration. \**p* < 0.05 and \*\**p* < 0.01 vs. *Ldlr*<sup>-/-</sup>

998 mice. **(C, F)** Plasma lipoprotein lipase activity in 8-week-old female *Ldlr*<sup>-/-</sup> (*n* = 5) and

999 *Ldlr*<sup>-/-</sup>*Creb3l3*<sup>-/-</sup> mice (*n* = 6) **(C)** and male *Ldlr*<sup>-/-</sup> (*n* = 5) and *Ldlr*<sup>-/-</sup>TgCREB3L3 (*n* = 5) mice

1000 **(F)**. \**p* < 0.05 vs. *Ldlr*<sup>-/-</sup> mice.

1001

1002

1003

1004

## Figure 1—figure supplement 1

### 5 weeks male

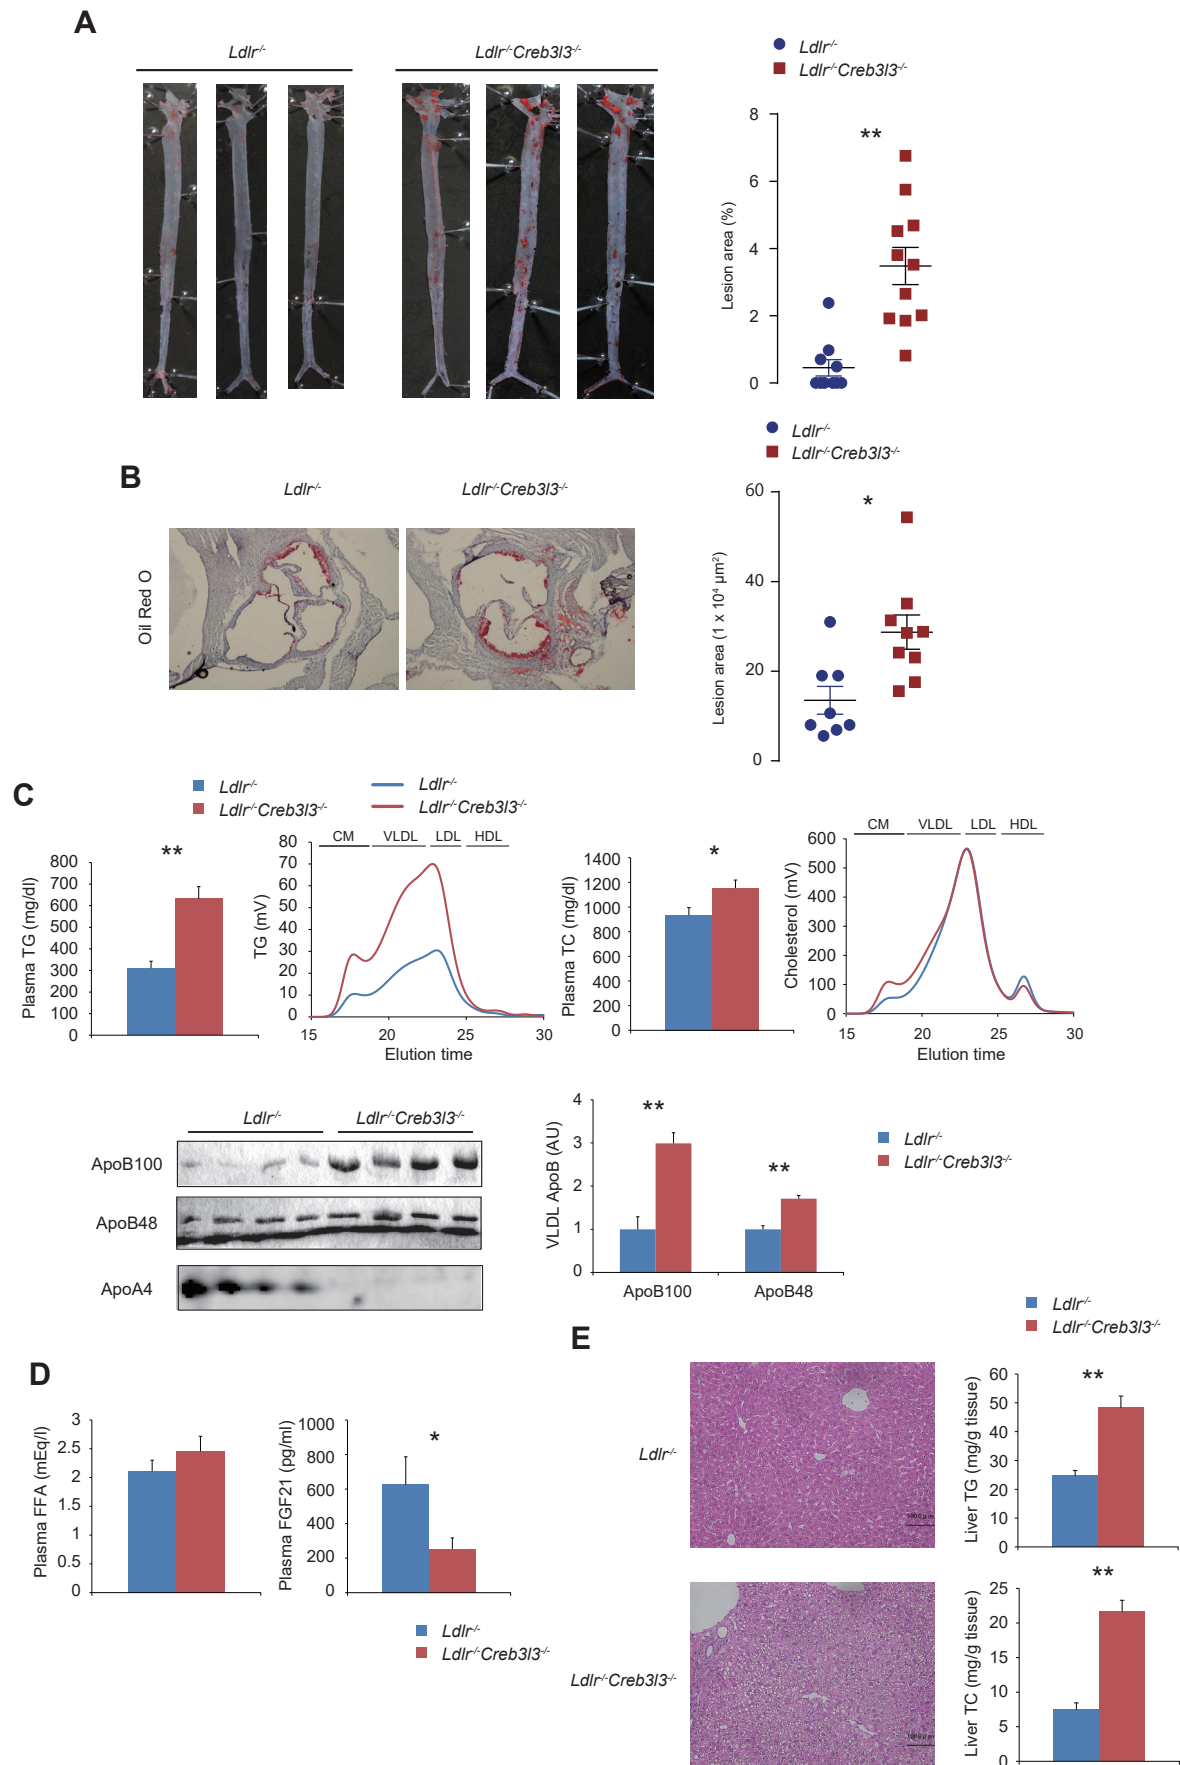



## Figure 1—figure supplement 2

16 week-old Normal diet

Female

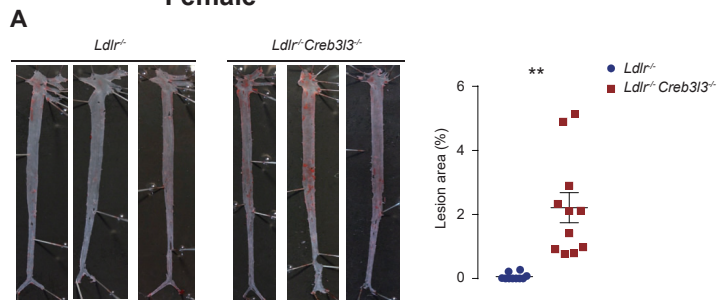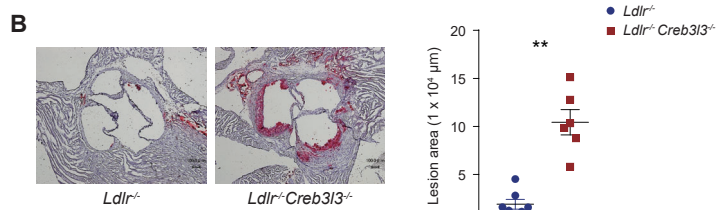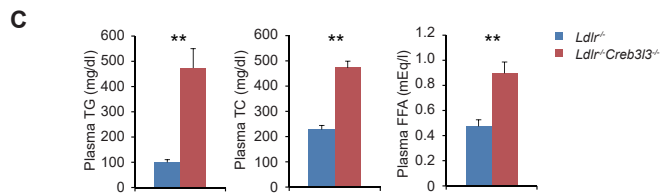

Male

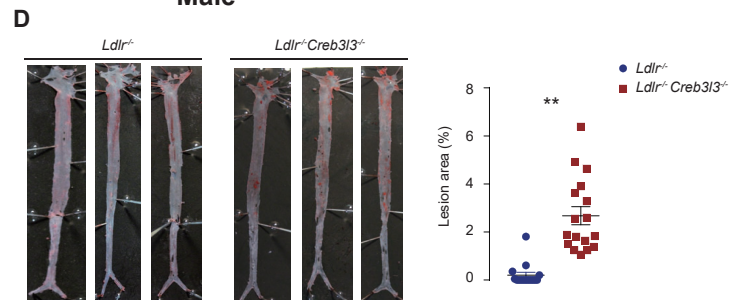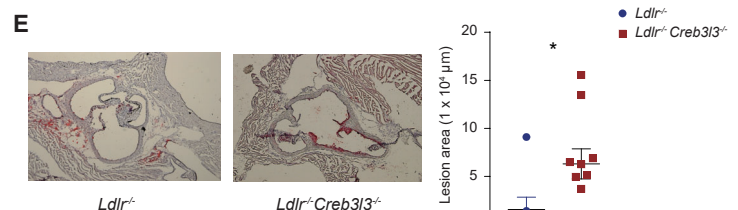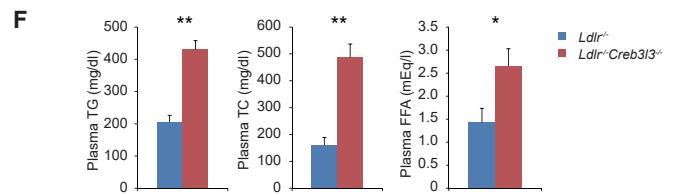

## Figure 1—figure supplement 3

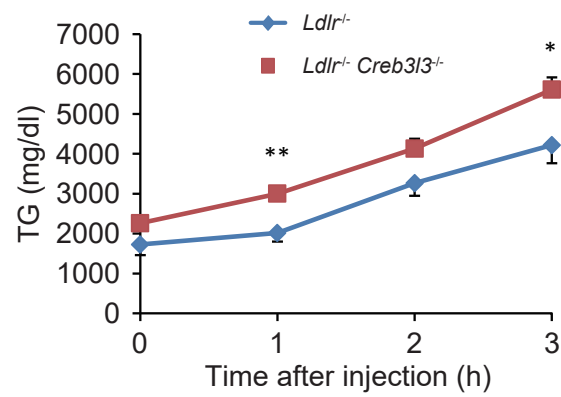

## Figure 3—figure supplement 1

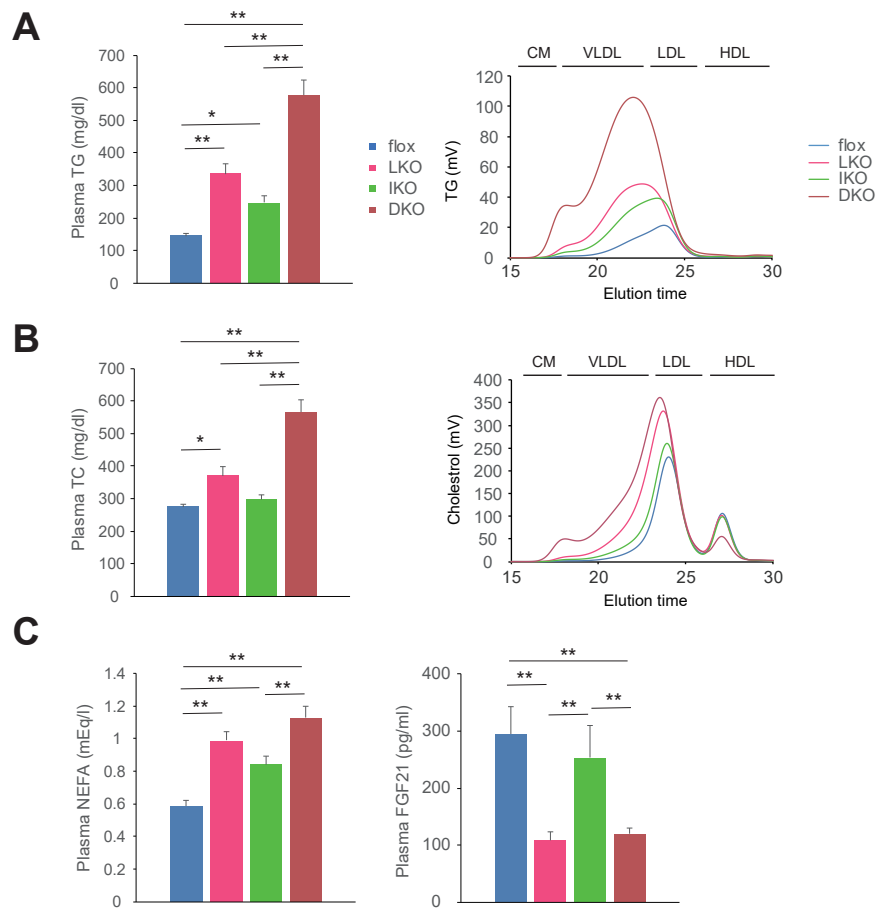

## Figure 4—figure supplement 1

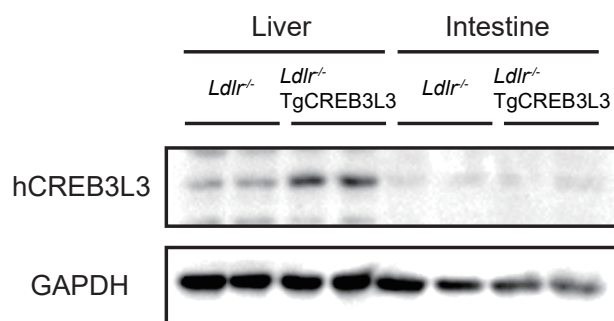

## Figure 5—figure supplement 1

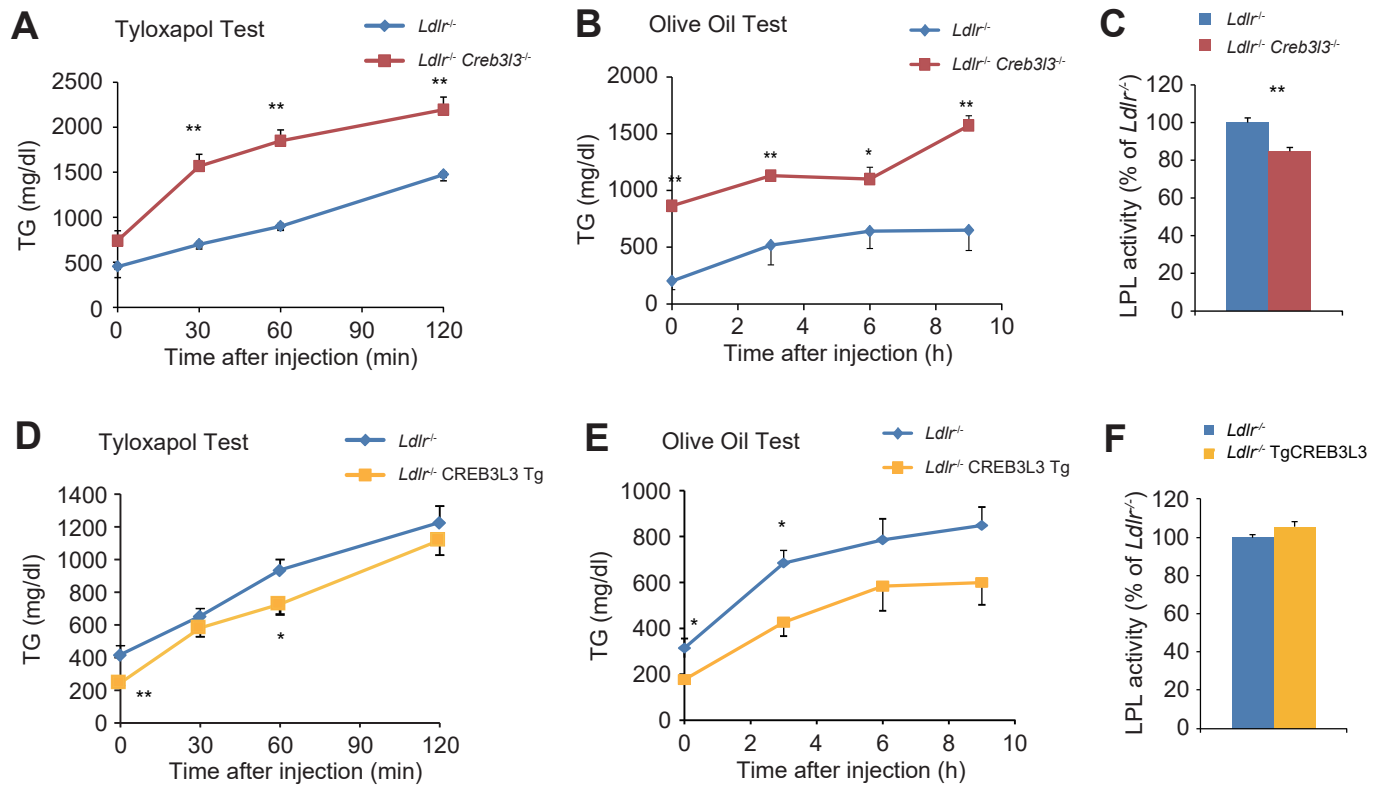

**Supplementary Table 1 Primers used for real-time PCR analysis.**

| Gene name          | Fwd                        | Rv                       |
|--------------------|----------------------------|--------------------------|
| <i>Abca1</i>       | AAAACCGCAGACATCCTTCAG      | CATACCGAAACTCGTTCACCC    |
| <i>Abcg1</i>       | CCATGAATGCCAGCAGCTACT      | CTGTGAAGTTGTTGTCCACCTTCT |
| <i>Abcg5</i>       | AGGGCCTCACATCAACAGAG       | GCTGACGCTGTAGGACACAT     |
| <i>Abcg8</i>       | AGTGGTCAGTCCAACACTCTG      | GAGACCTCCAGGGTATCTTGAA   |
| <i>Acox1</i>       | CGATCCAGACTTCCAACATGAG     | CCATGGTGGCACTCTTCTTAACA  |
| <i>Angptl3</i>     | TCTACTGTGATACCCAATCAGGC    | CATGTTTCGTTGAAGTCCTGTGA  |
| <i>Angptl4</i>     | GCATCCTGGGACGAGATGAAC      | CCCTGACAAGCGTTACCACA     |
| <i>Angptl6</i>     | TTGGGCGTCCAGAAGGAGAA       | CAGTCCTCTAGGAGTATCAGCAG  |
| <i>Apoa1</i>       | TCACCCACACCCTTCAGGAT       | CTGGCTCCCTGTCAGGAAGA     |
| <i>Apoa4</i>       | TTACCCAGCTAAGCAACAATGC     | GAGGGTACTGAGCTGCTGAGTGA  |
| <i>Apoa5</i>       | GCGAGTTCTGCCGTAGGAC        | CCCAACCCCATCAAATGTGA     |
| <i>Apob</i>        | TTGGCAAACGCATAGCATCC       | TCAAATTGGGACTCTCCTTTAGC  |
| <i>Apoc2</i>       | CCAAGGAGGTTGCCAAAGAC       | TGCCTGCGTAAGTGCTCATG     |
| <i>Apoc3</i>       | TACAGGGCTACATGGAACAAGC     | CAGGGATCTGAAGTGATTGTCC   |
| <i>Bip</i>         | ACATCAAGCAGTACCAGATCAC     | AACCCCGATGAGGCTGTAGC     |
| <i>Bsep</i>        | CAATGTTTCAGTTCCTCCGTTCA    | TCTCTTTGGTGTGTCCCCATA    |
| <i>Cpt1a</i>       | CCTGGGCATGATTGCAAAG        | GGACGCCACTCACGATGTT      |
| <i>Creb3l3</i>     | CCTGTTTGATCGGCAGGAC        | CGGGGGACCATAATGGAGA      |
| <i>Cyclophilin</i> | TGGCTCACAGTTCTTCATAACCA    | ATGACATCCTTCAGTGGCTTGTC  |
| <i>Cyp7a1</i>      | GCTGAGAGCTTGAAGCACAAAGA    | TTGAGATGCCAGAGGATCAC     |
| <i>Cyp8b1</i>      | CTAGGGCCTAAAGGTTTCGAGT     | GTAGCCGAATAAGCTCAGGAAG   |
| <i>Cyp27a1</i>     | CCAGGCACAGGAGAGTACG        | GGCAAGTGCAGCACATAG       |
| <i>Dhcr7</i>       | CACCGGCCGTGCTAGTCTGG       | CAGGCTTGTAGCCCGTTCACCTC  |
| <i>Dgat1</i>       | CGTGGGCGACGGCTACT          | GAAACCACTGTCTGAGCTGAACA  |
| <i>Dgat2</i>       | GCCCGCAGCGAAAACA           | GTCTTGGAGGGCTGAGAGGAT    |
| <i>Elovl6</i>      | ACAATGGACCTGTCAGCAAA       | CTACCAGTGCAGGAAGATCAGT   |
| <i>Fasn</i>        | ATCCTGGAACGACGAGAACACGATCT | AGAGACGTGTCATCCTGGACTT   |
| <i>Fbxw7a</i>      | CTCACCAGCTCTCCTCTCCATT     | GCTGAACATGGTACAAGGCCA    |
| <i>Fgf21</i>       | AGATCAGGGAGGATGGAACA       | TCAAAGTGAGGCGATCCATA     |
| <i>Fxr</i>         | CTCTGCTCACAGCGATCGTC       | CACCGCCTCTCTGTCCTTGA     |
| <i>Hmgcs1</i>      | AACTGGTGCAGAAATCTCTAGC     | GGTTGAATAGCTCAGAACTAGCC  |
| <i>Hmgcr</i>       | GAGAAGAAGCCTGCTGCATA       | CGTCAACCATAGCTTCCGTAGTT  |

|                |                             |                           |
|----------------|-----------------------------|---------------------------|
| <i>Insig1</i>  | TCACAGTGA CTGAGCTTCAGCA     | TCATCTTCATCACACCCAGGAC    |
| <i>Insig2a</i> | CCCTCAATGAATGTA CTGAAAGGATT | TGTGAAAGTGAAGCAGACCAATGT  |
| <i>Insig2b</i> | CCGGGCAGAGCTCAGGAT          | GAAGCAGACCAATGTTTCAATGG   |
| <i>Lxra</i>    | AGCAACAGTGTAACAGGCGCT       | ACGATGGCCAGCTCAGTAAAGT    |
| <i>Lxrb</i>    | ATGTCTTCCCCACAAGTTCT        | GACCACGATGTAGGCAGAGC      |
| <i>Mttp</i>    | AGCTTTGTCAACCGCTGTGC        | TCCTGCTATGTTTGTGGAAGT     |
| <i>Npc1l1</i>  | ATCCTCATCCTGGGCTTTGC        | GCAAGGTGATCAGGAGTTGA      |
| <i>Pltp</i>    | GACGACGAGAGGATGGTGTACG      | GTCGGACTCAGGAGAACAATGC    |
| <i>Pnpla3</i>  | TCACCTTCGTGTGCAGTCTC        | CCTGGAGCCCGTCTCTGAT       |
| <i>Ppara</i>   | TTGTGGCTGGTCAAGTTCGG        | GCTCTCTGTGTCCACCATGT      |
| <i>S14</i>     | ATGCAAGTGCTAACGAAACGC       | GGAGTACCGATCCATGACTGTC    |
| <i>Scap</i>    | ATTTGCTCACCGTGGAGATGTT      | GAAGTCATCCAGGCCACTACTAATG |
| <i>Scd1</i>    | AGATCTCCAGTTCTTACACGACCAC   | CTTTCATTTCAGGACGGATGTCT   |
| <i>Shp</i>     | CAAGGAGTATGCGTACCTGAAG      | CCTGGCACATCTGGGTTGAAG     |
| <i>Sqle</i>    | AAATCAGAGCCGTGGGCTAC        | GGAAGTGACACAGTTCTATG      |
| <i>Srebf1c</i> | CGGCGCGGAAGCTGT             | TGCAATCCATGGCTCCGT        |
| <i>Srebf2</i>  | CTGCAGCCTCAAGTGCAAAG        | CAGTGTGCCATTGGCTGTCT      |
| <i>Vldlr</i>   | TTCCTAGCTCATCCTCTTGACAC     | CTGACCCAGTGAATTTATTGGC    |
